1 *Extracellular matrix protein composition dynamically changes during murine forelimb development*

2  
3 Kathryn R. Jacobson<sup>1,2</sup>

4 Aya M. Saleh<sup>3</sup>

5 Sarah N. Lipp<sup>3,4</sup>

6 Alexander R. Ocken<sup>3</sup>

7 Tamara L. Kinzer-Ursem<sup>1,3</sup>

8 Sarah Calve<sup>1,3,5,\*</sup>

9  
10 <sup>1</sup>Purdue University Interdisciplinary Life Science Program; Purdue University; West Lafayette, Indiana,  
11 47907; United States

12 <sup>2</sup>Department of Agricultural and Biological Engineering; Purdue University; West Lafayette, Indiana  
13 47907; United States

14 <sup>3</sup>Weldon School of Biomedical Engineering; Purdue University; West Lafayette, Indiana, 47907; United  
15 States

16 <sup>4</sup>The Indiana University Medical Scientist/Engineer Training Program; Indiana University; Indianapolis,  
17 Indiana, 46202; United States

18 <sup>5</sup>Paul M. Rady Department of Mechanical Engineering; University of Colorado – Boulder; Boulder,  
19 Colorado, 80309; United States

20 \*Corresponding Author and Lead Contact: Prof. Sarah Calve, Tel: (303) 492-7604, E-mail:

21 [sarah.calve@colorado.edu](mailto:sarah.calve@colorado.edu)

22

23 **Summary**

24 The extracellular matrix (ECM) is an integral part of multicellular organisms, connecting different cell  
25 layers and tissue types. During morphogenesis and growth, tissues undergo substantial reorganization  
26 involving cellular proliferation, migration, and differentiation. While it is intuitive that the ECM remodels  
27 in concert, little is known regarding how matrix composition and organization change during development.  
28 We utilized tissue fractionation and mass spectrometry to define ECM protein (matrisome) dynamics during  
29 murine forelimb development and resolved significant differences in ECM composition as a function of  
30 development, disease and tissue type. Additionally, we used bioorthogonal non-canonical amino acid  
31 tagging (BONCAT) to label newly synthesized ECM within the developing forelimb. We demonstrate the  
32 feasibility of using BONCAT to enrich for newly synthesized matrisome components and identified  
33 differences in ECM synthesis between morphogenesis and growth. This resource will guide future research  
34 investigating the role of the matrisome during complex tissue development.

35

36 **Keywords:** mouse; extracellular matrix; matrisome; limb development; murine morphogenesis and growth;  
37 mass spectrometry; bioorthogonal non-canonical amino acid tagging; osteogenesis imperfecta; brain

38

## 39 **Introduction**

40 After fertilization, the cells of the embryo transition from a homogenous cell mass to a heterogeneous  
41 collection of tissues that assemble into the organ systems of the adult. Techniques characterizing the  
42 genome, epigenome, transcriptome and proteome dynamics during embryonic development have provided  
43 a global understanding of signaling pathway dynamics that regulate cellular function during morphogenesis  
44 (Yang, et al., 2019; Zheng and Xie, 2019; Baralle and Giudice, 2017; Scialdone, et al., 2016). Another  
45 important regulator of embryogenesis is the extracellular matrix (ECM), a collection of proteins and  
46 glycosaminoglycans that assemble into tissue-specific, interpenetrating networks. These active networks  
47 maintain the physical integrity of tissues, serve as a reservoir for growth factors and act as a medium for  
48 sensing and transducing mechanical signals through ECM-cell interactions (Felsenthal and Zelzer, 2017;  
49 Rozario and Desimone, 2010). As the demands of the environment change during morphogenesis, growth  
50 and homeostasis, it is likely the ECM remodels in concert; however, the contribution of the ECM, and how  
51 it changes during complex tissue development, is not well defined.

52 The murine forelimb is an ideal model system to investigate how different factors regulate  
53 morphogenesis. In the developing mouse, the forelimb bud starts off as a relatively disorganized tissue and,  
54 over the course of 4-5 days, the cells assemble into muscle, connective tissue and cartilage, with seamless,  
55 complex interfaces to form the basis of a functional musculoskeletal system (Huang, 2017; Charvet, et al.,  
56 2012). The ECM composition and architecture varies widely across these distinct tissues; however, the  
57 influence of the matrix during the specification, integration and maturation of musculoskeletal tissues is  
58 poorly understood.

59 The gap in knowledge regarding ECM dynamics during morphogenesis can be attributed to the previous  
60 lack of techniques that could resolve changes in the matrix within developing tissues. The identification of  
61 differences in ECM composition between tissues was hindered by the relative insolubility of the matrisome  
62 compared to intracellular proteins (Naba, et al., 2012). Additionally, ECM proteins make up a small  
63 percentage of the total protein content in many tissues. To address these challenges, techniques combining  
64 liquid chromatography-tandem mass spectrometry (LC-MS/MS) and tissue fractionation were developed

65 to identify how the composition of ECM proteins, or the matrisome, varies between different adult and  
66 pathological tissues (reviewed in (Taha and Naba, 2019)). Recently, our lab extended these techniques to  
67 analyze the matrisome of embryonic murine tissues (Saleh, et al., 2019a); however, this only provided a  
68 snapshot of the static matrisome at a certain stage of development and was unable to resolve when specific  
69 proteins were made. Identification of the proteins synthesized at a given timepoint will provide more  
70 information about the dynamics of critical components that drive changes in tissue structure and remodeling  
71 during development.

72 Biorthogonal non-canonical amino acid tagging (BONCAT) is a technique previously used by our  
73 group and others to identify the newly synthesized proteome in embryonic, adult and pathological tissues  
74 (Saleh, et al., 2019b; Dieterich, et al., 2006). BONCAT utilizes non-canonical amino acids (ncAAs) that  
75 are incorporated into proteins using the endogenous cellular translational machinery. These ncAAs possess  
76 biorthogonal moieties (*e.g.* azides) that enable the enrichment of newly synthesized proteins (NSPs) through  
77 click chemistry reactions with complementary chemical groups (*e.g.* alkynes). BONCAT was previously  
78 used to enrich for soluble proteins, but translation of this technique to the insoluble matrisome has yet to  
79 be demonstrated.

80 The goals of this study were to (1) expand our recent work on the proteomic analysis of developing  
81 tissues to account for significant increases in protein content during embryogenesis; (2) establish a baseline  
82 proteomic resource of static and newly synthesized matrisome dynamics during morphogenesis and growth  
83 in the wild-type (WT) murine forelimb; and (3) resolve differences in matrisome composition between (a)  
84 pathological and WT tissues and (b) tissues from distinct organ systems. We were able to resolve  
85 differences in relative matrisome composition of forelimbs that ranged from embryonic day (E)11.5-  
86 postnatal day (P)35, and found that ECM protein composition during morphogenesis (E11.5-E14.5) was  
87 markedly different compared to growth timepoints (P3-P35). To identify NSPs, mice were tagged with the  
88 ncAA azidohomoalanine (Aha) when musculoskeletal patterning was just established (E13.5-E14.5) and  
89 compared to an adolescent timepoint representative of growth (P35 – P36). The standard BONCAT method  
90 was optimized to enrich for Aha-tagged ECM prior to LC-MS/MS and identify different patterns of

91 synthesis that could not be revealed by only investigating the static matrisome. We next confirmed that the  
92 tissue fractionation and LC-MS/MS techniques were able to resolve differences in matrisome composition  
93 in WT E14.5 murine forelimbs compared to *Colla2*-mutants, which exhibit musculoskeletal defects. As  
94 expected, we found a significant decrease in the abundance of chains associated with type I collagen fibrils  
95 (COL1A1, COL1A2, COL3A1 and COL5A1). Interestingly, there was an increase in lysyl oxidase-like  
96 (LOXL) proteins that modify constituents of collagen fibrils, which can lead to over-modification and  
97 incorrect integration of these chains into fibrils. Finally, these techniques were used to determine the unique  
98 composition of the matrisome in WT E14.5 brains compared with forelimbs. While the most abundant ECM  
99 proteins found in both tissues were similar, there were many exclusively identified in each tissue, which  
100 correlated with the contrasting biological functions. Collectively, these results demonstrate the feasibility  
101 of using tissue fractionation and ncAA tagging to resolve differences in ECM protein composition as a  
102 function of age, disease and tissue type, providing a map of the matrisome during forelimb development.  
103 These methods can be easily extended to investigating the role of the matrisome in other systems during  
104 morphogenesis and growth.  
105

106 **Results and Discussion**

107 *Fractionation of whole embryonic tissue increased ECM protein identification and enabled temporal*  
108 *analysis of the matrisome*

109 We previously demonstrated that fractionation of E15.5 murine embryos facilitated the analysis of the  
110 matrisome via LC-MS/MS (Saleh, et al., 2019a). To confirm that fractionation provides the same benefits  
111 for earlier embryonic timepoints wherein the ECM may be less cross-linked, E12.5 wild-type (WT)  
112 embryos were homogenized then fractionated using buffers designed to selectively extract cytosolic (C),  
113 nuclear (N), membrane (M) and cytoskeletal (CS) proteins, leaving behind an ECM-rich insoluble (IN)  
114 pellet (Naba, et al., 2015) (**Figure S1A**). All samples were processed for LC-MS/MS, raw protein intensities  
115 were determined by MaxQuant (Cox and Mann, 2008) and proteins were categorized into cellular  
116 compartments (Saleh, et al., 2019a). Within the homogenate, 20 ECM proteins were identified; however,  
117 these proteins only represented  $0.8\% \pm 0.3\%$  of the total raw intensity (**Figure S1B, Table S1**). In contrast,  
118 the percentage of matrisome in the IN pellet was  $91.5\% \pm 3.5\%$ , indicating tissue fractionation significantly  
119 increased the identification of ECM proteins in E12.5 embryos (**Table S1**). The amount of ECM protein in  
120 the C, N and M fractions contributed to less than  $1.0\% \pm 0.9\%$  of the total raw intensity. In comparison,  
121 ECM proteins contributed  $2.3\% \pm 1.1\%$  of the total raw intensity of the CS fractions. For subsequent studies,  
122 the CS and IN fractions were analyzed via LC-MS/MS separately, while the C, N and M fractions were  
123 combined into one ‘CNM’ fraction.

124 To investigate whether fractionation was amenable for temporal analysis of the embryonic matrisome,  
125 the CNM, CS and IN fractions of E11.5-E14.5 WT embryos were analyzed by LC-MS/MS (**Figure 1A**).  
126 Across all fractions and timepoints, 3227 proteins were identified, 122 of which were part of the matrisome  
127 (**Table S2**). Less than 1% and 5% of the raw intensity in CNM and CS fractions, respectively, were  
128 attributed to ECM proteins, consistent with our previous study (Saleh, et al., 2019a) (**Figures 1B, S1**).  
129 Importantly, the matrisome was enriched in the IN fraction, where at least 30% of the raw intensity was  
130 from ECM proteins.

131 GO analysis was conducted on the 50 most abundant proteins in each fraction for E14.5 embryos.  
132 “Cellular Component” terms indicated proteins extracted in the C, N and M buffers were from intracellular  
133 compartments, and the most significant “Biological Process” terms corresponded to intracellular  
134 organization and protein interactions (**Figure 1C**). In contrast, GO terms generated by the most abundant  
135 proteins of the IN fraction highly correlated with the ECM. Unbiased hierarchical clustering for the same set  
136 of proteins showed matrixome components were enriched in the IN fraction (**Figure S2**). Collectively, these  
137 results validate that fractionation enhanced identification of the matrixome in developing murine embryos.  
138

### 139 *Global ECM composition significantly changed during forelimb development*

140 To investigate matrixome dynamics as a function of musculoskeletal development, entire forelimbs,  
141 from the scapula through the digit tips, were isolated from E11.5-P35 mice (**Figure 2A**). Tissues were  
142 fractionated as described above and CS and IN fractions were analyzed by LC-MS/MS (**Figure 2B**).  
143 Collectively, 1601 proteins were identified, including 147 ECM proteins (**Table S3**). The amount of  
144 matrixome varied significantly between timepoints and fractions; similar to whole embryonic tissue, ECM  
145 proteins were significantly enriched in the IN fraction (**Figure 2C**).

146 Collagens were the most abundant ECM proteins identified in the IN fraction at all timepoints (**Figure**  
147 **2D**). ECM glycoproteins were the second most abundant, but the relative percentage of the total matrixome  
148 decreased with development. Similar trends were found in the CS fractions; however, there were  
149 significantly more secreted factors, ECM regulators and ECM-affiliated proteins compared to the IN  
150 fraction (**Table S3**).

151

### 152 *Matrixome dynamics varied during musculoskeletal morphogenesis and growth*

153 Next, we combined protein intensities from CS and IN fractions and analyzed matrixome changes  
154 during morphogenesis and growth using a heat map (**Figure 3A**). Combining LFQ intensities from CS and  
155 IN fractions allowed for direct comparison between timepoints (**Figure S3C**). The amount of matrixome  
156 extracted in each fraction varied depending on ECM classification (**Figure S3D, E**). Fibril-forming

157 collagens (types I, II, III, V, XI) and ECM glycoproteins, in particular those proteins that make up elastic  
158 fibrils (ELN, FBLN2, FBN1, FBN2, MFAP2), were predominantly found in the IN fraction, which is likely  
159 due to the extensive cross-linking that holds these proteins together (Schröder, et al., 2018; Tanzer, 1973).  
160 Interestingly, many proteoglycans, including small leucine-rich proteoglycans (SLRPs), were found at  
161 larger percentages in the CS fraction. SLRPs are known to play roles in regulating collagen fibril assembly  
162 and bind to fibrils non-covalently, which may explain the increased extractability of these proteins (Neame,  
163 et al., 2000). The majority of the ECM-affiliated proteins, ECM-regulators and secreted factors were  
164 identified either exclusively or more abundant in the CS fraction. Many of these proteins remain in  
165 cytoplasmic regions until needed for matrix-cell signaling transduction (MEGF6), collagen post-  
166 translational modifications (LOX, PLOD1-3) and network degradation (MMP13) (Vallet and Ricard-Blum,  
167 2019; Hu, et al., 2018; Qi and Xu, 2018; Lu, et al., 2011). Since these proteins enzymatically modulate the  
168 existing ECM, rather than integrate into the networks, they were are more soluble and removed in earlier  
169 fractions. While many of the recent matrisome studies only analyze the final, IN fraction (Fava, et al., 2018;  
170 Suna, et al., 2018; Naba, et al., 2017a), our data showed that some ECM proteins are extracted in the other  
171 buffers. Depending on the proteins of interest, future investigations need to ensure the appropriate fractions  
172 are analyzed. Nevertheless, fractionation enables identification of how ECM changes, here as a function of  
173 age (**Figure 3**), even if only one fraction is analyzed.

174 In the early stages of morphogenesis, key proteins are critical for various ECM networks to polymerize  
175 and facilitate the formation of distinct tissues. ECM proteins associated with morphogenesis (FN1, FBN2,  
176 EMILIN1, TGF $\beta$ I) were abundant in the forelimb and expression decreased at older timepoints  
177 (Schiavinato, et al., 2017; Xu, et al., 2009; Sottile and Hocking, 2002; Chaudhry, et al., 2001) (**Figure 3A**,  
178 **Table S3**). For example, the normalized LFQ intensity of FN1 was high at E11.5 then decreased in relative  
179 abundance as a function of forelimb development (**Figure 3**). FN1 orchestrates the assembly of ECM  
180 protein networks, including types I and III collagen, fibrillins, THBS1 and LTBP1 (Kadler, et al., 2008;  
181 Dallas, et al., 2005), and global FN1 knockout is embryonic lethal before E11 (George, et al., 1993).



182 Type I collagen fibrils are another important component of tissues. The relative amount of  $\alpha 1$  and  $\alpha 2$   
183 chains that comprise the type I collagen heterotrimer ( $\alpha 1(I)$  and  $\alpha 2(I)$ , respectively), significantly increased  
184 with development and accounted for  $42.0\% \pm 4.1\% - 84.8\% \pm 2.1\%$  of total collagen content (**Table S3**).  
185 The ratio between  $\alpha 1(I)$  and  $\alpha 2(I)$  chains was not significantly different between timepoints and the average  
186 across all timepoints ( $1.8 \pm 0.3$ ) was similar to the standard ratio of 2:1 for  $\alpha 1(I):\alpha 2(I)$  reported in the  
187 literature (Birk and Brückner, 2011) (**Figure 3B, Table S3**).

188 In contrast, the relative abundance of collagens involved in type I collagen fibrillogenesis, including  
189 types III and V (Kadler, et al., 2008), significantly varied over development. Type III collagen forms  
190 independent fibrils out of  $\alpha 1(III)$  homotrimers as well as heterotypic fibrils with type I collagen (Liu, et al.,  
191 1997). *In vivo* and *in vitro* studies suggest that type III collagen inhibits the increase in diameter of type I  
192 collagen fibrils (Asgari, et al., 2017; Liu, et al., 1997). The ratio of  $\alpha 1(I):\alpha 1(III)$  significantly increased  
193 between E11.5 and P35 (**Figure 3B, Table S3**), consistent with previous observations that type I collagen  
194 fibril diameter increases during development (Parry, et al., 1978).

195 Type V collagen is a quantitatively minor component, accounting for  $1.1\% \pm 0.5\%$  of collagen content  
196 across all timepoints (**Table S3**). Nevertheless, it is critical for the initiation of type I collagen fibrillogenesis  
197 and forms homo- and heterotypic combinations of three alpha chains,  $\alpha 1(V)$ ,  $\alpha 2(V)$  and  $\alpha 3(V)$  (Wenstrup,  
198 et al., 2004). The ratio of  $\alpha 1(I):\alpha 1(V)$  did not significantly change as a function of development; however,  
199  $\alpha 1(I):\alpha 2(V)$  and  $\alpha 1(V):\alpha 2(V)$  were significantly different between stages of morphogenesis and growth  
200 (**Figure 3B, Table S3**). Variations in the chain composition of type V collagen were previously described  
201 in the cornea (Birk, 2001); however, additional studies need to be conducted to elucidate the functional  
202 importance of changes in type V collagen isoforms during forelimb development.

203 Other distinct trends were visualized by comparing protein intensities at two timepoints during  
204 morphogenesis (E12.5 vs. E14.5) and morphogenesis and growth (E14.5 vs. P35) using volcano plots. ECM  
205 proteins associated with chondrogenesis were increased in E14.5 forelimbs compared to E12.5 (**Figure**  
206 **3C**), including types IX and XI collagen, MATN1 and BGN (Li, et al., 2018; Krug, et al., 2013; Embree,

207 et al., 2010; Nicolae, et al., 2007). Proteins important during endochondral ossification, such as type X  
208 collagen (Kwan, et al., 1997), were significantly more abundant at E14.5 and decreased at P35 (**Figure**  
209 **3D**), indicating that the transition from cartilage to bone neared completion by P35. Furthermore, ECM  
210 proteins identified exclusively, or in higher abundance, at P35, such as CILP2 and OGN, are associated  
211 with bone maturation and homeostasis (Lee, et al., 2018; Bernardo, et al., 2011).

212 Comparison of Pearson correlation coefficients confirmed the difference in matrisome content between  
213 embryonic and adolescent timepoints (**Figure 3E**). There was low correlation between embryonic (E11.5-  
214 E14.5) and P35 forelimbs, whereas the correlation within embryonic timepoints was higher. Taken together,  
215 these data demonstrated ECM proteins are differentially expressed during musculoskeletal tissue  
216 morphogenesis and growth.

217

#### 218 *Spatial distribution of ECM proteins changed within musculoskeletal tissues during development*

219 LC-MS/MS analysis revealed how the ECM dynamically changes in the developing forelimb (**Figure**  
220 **3**); however, proteomics alone does not provide spatial information of the matrisome within distinct tissues.  
221 To gain more insight into how the distribution of the matrisome changes during forelimb development, and  
222 validate the LC-MS/MS results, ECM proteins with differing patterns of abundance were investigated via  
223 immunohistochemistry (IHC, **Figure 4, Table S4**). While the distribution of the mRNA or protein for some  
224 of these ECM can be found in the literature at distinct stages of development, a comprehensive investigation  
225 of the matrisome during musculoskeletal tissue assembly during the timepoints in this study has not been  
226 conducted. The identification of these ECM proteins with respect to specific tissues is summarized in **Table**  
227 **S4**.

228 HSPG2 and type I collagen (COL I) were two proteins that continuously increased in abundance  
229 between E11.5 – P35 (**Figure 4A, Table S4**). Staining for HSPG2 localized to blood vessels at E11.5, but  
230 was abundant in the skeletal template in all subsequent timepoints, with more diffuse labeling throughout  
231 the surrounding mesenchyme (**Figures 4, S4**). Postnatally, HSPG2 increased throughout all mesenchymal  
232 tissues. HSPG2 is a component of the pericellular matrix surrounding mature muscle fibers, tenocytes,

233 chondrocytes and osteocytes (Martinez, et al., 2018; Taylor, et al., 2011; Hassell, et al., 2002). The  
234 importance of this proteoglycan in the musculoskeletal system is seen in Schwartz-Jampel Syndrome,  
235 which is due to the knockdown of HSPG2, and manifests in chondrodysplasia and neuromyotonia (Stum,  
236 et al., 2008). In contrast, COL I was diffusely distributed throughout the limb bud, with slightly increased  
237 expression in condensing cartilage at E11.5-E12.5 (**Figures 4, S5**). However, at E13.5 there was little COL  
238 I visualized in the skeletal template compared with the surrounding mesenchyme until the onset of  
239 endochondral ossification. COL I was widely expressed in the adult, as expected since COL I is the most  
240 abundant ECM protein in mammals where mutations lead to defects, such as osteogenesis imperfecta, in  
241 which the mechanical integrity of tissues is compromised (Di Lullo, et al., 2002).

242 Type V collagen (COL V), which facilitates COL I fibrillogenesis, also increased in abundance as a  
243 function of development (**Figure 4A**). The distribution of COL V was similar to that of COL I, except it  
244 was not localized to the condensing cartilage at E12.5. In addition, it was enriched at the cavitating elbow  
245 joint, whereas COL I was more prevalent in the rest of the perichondrium/osteum. This is consistent with a  
246 previous observation that *pro-Col5a3* mRNA was highly expressed at the hip joint in E15.5 embryos  
247 (Imamura, et al., 2000). Notably, defects in COL V chains lead to Ehlers-Danlos Syndrome, which is  
248 characterized by laxity of connective tissues, particularly around the joint where the insertions of COL I-  
249 and COL V-rich tendons and ligaments form (Symoens, et al., 2012; Imamura, et al., 2000).

250 Two proteins that were abundant at E11.5 and decreased over development were EMILIN1 and FBN2  
251 (**Figure 4A**). Similar to COL I, both were diffuse throughout the limb at E11.5; however, the distribution  
252 became more restricted to the perichondrium/osteum, tendons and ligaments over time (**Figures 4, S5, S6**).  
253 In the adult, EMILIN1 and FBN2 were found at lower levels, compared with earlier timepoints, with the  
254 exception of the tendons and ligaments (**Figure 4**). The abundance of FBN2 and EMILIN1 early in limb  
255 morphogenesis indicates these ECM proteins play important roles in musculoskeletal patterning. Indeed,  
256 knockout of FBN2 leads to abnormal mesenchymal differentiation and syndactyly (Arteaga-Solis, et al.,  
257 2001), and mutation of *EMILIN1* leads to musculoskeletal deformities (Capuano, et al., 2016).

258 NID2 and TNC are two proteins that transiently peak in abundance during development; both increased  
259 from E12.5-P3, but then significantly decreased between P3-P35 (**Figure 4A, Table S4**). NID2, a basement  
260 membrane protein, surrounded developing myotubes at E12.5 and then had a more punctate distribution at  
261 later timepoints (**Figure 4, S6**). This staining pattern is consistent with reports that NID2 becomes restricted  
262 to the neuromuscular junction during maturation (Fox, et al., 2008). TNC was first visualized in the  
263 condensing cartilage at E12.5 and then was predominantly found in the perichondrium/osteum, tendons,  
264 ligaments and bony spicules. While the restriction of TNC to the perichondrium/osteum is similar to that  
265 seen for FBN2 and EMILIN1, knockout of TNC does not lead to any overt musculoskeletal defects (Mackie  
266 and Tucker, 1999). Nevertheless, the transient upregulation of TNC during muscle repair and regeneration  
267 suggests this protein plays a currently undefined role in tissue growth that may be compensated for by other  
268 ECM at earlier timepoints (Calve, et al., 2010; Fluck, et al., 2008).

269 Overall, visualization of various ECM via IHC correlated with the changes in abundance identified  
270 with LC-MS/MS. Notably, ECM with similar changes in abundance were differentially localized within  
271 the limb, highlighting the need to not only identify what matrisome components are present but the  
272 distributions within tissues as well.

273

274 *Analysis of newly synthesized proteins at distinct timepoints identified dynamic changes in matrisome*  
275 *composition*

276 While LC-MS/MS and IHC analyses identified matrisome components that are present at a given  
277 timepoint, the proteins that are actively being synthesized at a specific stage cannot be distinguished. We  
278 hypothesized that identification of NSPs using BONCAT would reveal differences in the distribution of  
279 NSPs during morphogenesis compared to growth timepoints. Pregnant females were injected at E13.5 with  
280 either Aha or PBS (control) and forelimbs were harvested from embryos 6- and 24-hours post injection  
281 (hpi; E13.75 and E14.5, respectively) to identify ECM proteins actively synthesized during morphogenesis.  
282 To identify matrisome synthesized during growth, non-pregnant female mice were injected with either Aha  
283 or PBS at P35 and harvested 6- and 24-hpi (P35.25 and P36, respectively). Forelimbs were fractionated and

284 each IN fraction was split into two samples: (1) an “unenriched” sample that represented the background,  
285 static proteome, analogous to the IN fractions described in **Figure 2**, and (2) an “enriched” sample  
286 containing the isolated Aha-labeled proteins (**Figure 5A**). To enrich for and identify Aha-labeled ECM, it  
287 was necessary to resuspend the IN fraction in a strong denaturing agent (8M urea) to partially solubilize the  
288 relatively insoluble matrisome. The resuspended pellets were subjected to brief cycles of ultrasonic energy  
289 to further enhance the solubilization of ECM proteins. In addition, proteins were deglycosylated with  
290 chondroitinase ABC to digest the chondroitin sulfate chains and increase the accessibility of Aha residues  
291 to the biotin alkyne linker. This optimized technique enabled the use of BONCAT to characterize the *in*  
292 *vivo* matrisome for the first time.

293 The coverage of matrisome proteins in the unenriched fractions was comparable to the prior analysis  
294 of WT E14.5 and P35 forelimbs (**Tables S3, S5**). Interestingly, Pearson correlation coefficients revealed  
295 that E13.75 and E14.5 unenriched samples were less correlated than those from P35.25 and P36, indicating  
296 that the matrisome of the adolescent timepoints was less variable than that of the embryos (**Table S5**). NSPs  
297 isolated from the enriched samples were defined as being either (1) exclusively identified in Aha-labeled  
298 samples or (2) >2 fold-change in the raw intensity in Aha-labeled compared to PBS samples and statistically  
299 significant ( $p \leq 0.05$ , two-tailed t-test) (**Figures 5, S7, Table S5**).

300 We previously showed that the maximum amount of Aha-tagged proteins in the IN fraction occurs  
301 around 6-hpi (Saleh, et al., 2019a). Therefore, to identify trends of protein synthesis, the relative percentage  
302 of matrisome components was compared between the unenriched and enriched samples 6 hours after Aha  
303 administration (**Figure 5B, C**). Many NSPs followed expected trends based on static matrisome changes  
304 during development (**Figure 3A**). For example, there was a significantly higher percentage of COL1A1 in  
305 the enriched compared to the unenriched matrisome at E13.75 (**Figure 5B**); however, there was not a  
306 difference at P35 (**Figure 5C**). This corresponded with the rapid increase of type I collagen at early  
307 timepoints (**Figure 3A**) and indicated that the deposition of fibrillar collagen was approaching homeostasis  
308 at P35.25. FN1 and EMILIN1 were found at a significantly lower percentage in the E13.75 enriched sample  
309 compared to unenriched and FBN2 was only in the unenriched, indicating that synthesis of FN1, EMILIN1

310 and FBN2 was decreasing at this timepoint. Of those three proteins, only FN1 was found at P35.25 in the  
311 unenriched fraction, supporting our results that all three proteins decreased in abundance over development  
312 (**Figure 3A, 5C**). The relative percentage of COL2A1, a fibrillar collagen predominantly found in cartilage  
313 (Aszodi, et al., 2001), significantly increased in the E13.75 enriched sample, which correlates with the  
314 establishment of the cartilaginous template for the skeletal elements during this time (Martin, 1990). In  
315 contrast, the percentage of COL2A1 that was newly synthesized was significantly lower at P35.25, a time  
316 when most of the skeleton has undergone endochondral ossification (Karsenty and Wagner, 2002). The  
317 relative percentages of COL5A1, COL5A2 and TNC transiently decreased in abundance from E13.5 –  
318 E14.5, as well as P3 – P35 (**Figure 3A**), which correlates with the trends observed here.

319 The distribution of some NSPs was inconsistent with the static proteome. In particular, the relative  
320 amount of newly synthesized COL1A2 was not significantly higher than the unenriched at E13.75, unlike  
321 what was observed for COL1A1 (**Figure 5B**). This may indicate that the synthesis/degradation rate of the  
322 two chains are different. However, it is important to note that the metabolism of Aha *in vivo* is unknown;  
323 therefore, it is not clear how long Aha is available for incorporation into NSPs. Alternatively, some NSPs  
324 may differentially become cross-linked into the minor part of the matrisome that could not be solubilized  
325 prior to enrichment despite the denaturing conditions (Naba, et al., 2017b). Nevertheless, by comparing the  
326 NSPs identified at 6- and 24-hpi, biologically-relevant trends were observed. Cartilage-associated proteins  
327 (types IX and XI collagen, MATN1) were identified as NSPs exclusively in the embryonic forelimbs  
328 (**Figure 5D, 5F**). In addition, the NSPs of adolescent forelimbs corroborated our findings from the static  
329 matrisome that CILP2, NID1, TNXB, FMOD, PRELP and LUM, were synthesized and identified only  
330 postnatally (P3 and/or P35) (**Figures 3A, 5E, 5F**).

331 Furthermore, analysis of NSPs between E13.5-E14.5 enabled identification of ECM dynamics that were  
332 not revealed by the static proteome. For example, LAMA5 was identified in the enriched proteins of the  
333 E13.5-E14.5 labeling window but not identified in the unenriched samples or E14.5 static proteome,  
334 indicating this technique could capture and identify NSPs that are in lower abundance (**Figures 3, 5D, 5F**  
335 **Table S5**). The presence of LAMA5 is critical for digit septation; embryos lacking this laminin developed

336 syndactyly, most likely due to defective basement membrane formation that allowed for mesenchymal cells  
337 to migrate to the outside of the limb, instead of residing within the interdigit region (Miner, et al., 1998).

338 Collectively, enrichment of NSPs at the embryonic and adolescent timepoints revealed that different  
339 biological processes were occurring during tissue morphogenesis versus growth. Additionally, this  
340 technique will enable the identification of ECM proteins that are of low abundance, but nevertheless  
341 important for patterning and morphogenesis.

342

343 *Comparative analysis of matrisome composition between pathological and WT tissues: osteogenesis*  
344 *imperfecta murine (OIM) forelimbs*

345 To validate that tissue fractionation and LC-MS/MS can resolve differences in matrisome composition  
346 as a function of disease or phenotype, CS and IN fractions of E14.5 forelimbs from *osteogenesis imperfecta*  
347 *murine* (OIM, *Colla2*<sup>OIM</sup>) and WT littermates (*Colla2*<sup>WT</sup>) were compared (**Figure 6A**). Across all samples,  
348 2211 proteins were identified including 151 ECM proteins (**Table S6**).

349 In the OIM model, a single nucleotide deletion within the *Colla2* gene alters the final 50 amino acids  
350 of the propeptide (Chipman, et al., 1993). This defect inhibits incorporation of the pro- $\alpha$ 2 chains into the  
351 type I collagen triple helix, leading to decreased type I collagen fiber content and stability (Weis, et al.,  
352 2000; Chipman, et al., 1993). Correspondingly, there was a significant decrease in COL1A2 in OIM  
353 mutants (**Figure 6B**). Given that COL1A2 is not incorporated into type I collagen fibrils in the *Colla2*<sup>OIM</sup>  
354 embryos, we expected this chain would be more soluble compared to COL1A1. Indeed, we found that more  
355 COL1A2 was extracted in the CS fraction than COL1A1 (**Table S6**).

356 Comparison of Pearson correlation coefficients revealed that *Colla2*<sup>OIM</sup> and *Colla2*<sup>WT</sup> were moderately  
357 correlated, suggesting subtle changes in overall matrisome composition as a result of the absence of  
358 functional COL1A2 (**Figure 6C**). WT E14.5 forelimbs (E14.5<sup>WT</sup>, **Figure 2**) and *Colla2*<sup>WT</sup> showed high  
359 correlation, demonstrating the consistency of tissue fractionation across independent experiments for  
360 comparing the matrisome of developing tissues.

361 The abundance of collagens associated with type I collagen fibrillogenesis (types I, III and V),  
362 decreased in *Colla2*<sup>oIM</sup> forelimbs (**Figure 6D**). Classic phenotypes of osteogenesis imperfecta in humans  
363 include increased bone fragility and decreased bone mass due to the significant reduction of type I collagen  
364 integration (Morello, 2018). Interestingly,  $\alpha 1(\text{I}):\alpha 1(\text{III})$  and  $\alpha 1(\text{I}):\alpha 1(\text{V})$  ratios were not affected by the  
365 mutation, indicating that absence of COL1A2 does not directly interfere with collagen chain accumulation  
366 during fibrillogenesis (**Figure 6E**). During fibrillogenesis, various ECM proteins modify or chaperone  
367 collagen precursors and fibrils, including PCOLCE, PLODs and SERPINH1, all of which did not change  
368 as a result of the COL1A2 mutation (**Table S6**) (Qi and Xu, 2018; Widmer, et al., 2012; Steiglitz, et al.,  
369 2006). Other collagen-modifying proteins, including lysyl oxidase homologs (LOXL1-4), increased in  
370 abundance in mutants (**Table S6**). Since the abundance of collagen modifiers in *Colla2*<sup>oIM</sup> mutants did not  
371 decrease in parallel with type I, III and V collagens, the collagen precursors may be over-modified.  
372 Premature crosslinking can halt fibril polymer assembly, leading to the reduced fiber diameter and  
373 decreased mechanical strength observed in *Colla2*<sup>oIM</sup> mutants (Weis, et al., 2000; Bailey, et al., 1998).  
374 Additional studies are needed to validate this hypothesis and explain the decrease in types I, III and V  
375 collagens. Nevertheless, these techniques were able to reveal changes in composition and abundance of  
376 ECM proteins in a mouse model in which there is a defect in matrix synthesis.

377

#### 378 *Comparative analysis of tissue-specific matrisome composition: brains and forelimbs*

379 To further corroborate that these techniques are suitable for comparative developmental proteomics,  
380 the matrisome of embryonic brain was compared to that of the forelimb. Brains were collected from WT  
381 E14.5 embryos and processed the same as the forelimbs (**Figure 7A**). Across both brain and forelimb  
382 tissues, 1873 proteins were identified, 109 of which belonged to the matrisome (**Table S7**). Similar to other  
383 embryonic tissues, significantly more matrisome content was identified in the IN fraction (**Figure 7B**).  
384 Further, 27 and 33 ECM proteins were identified exclusively in brain and forelimb samples, respectively,  
385 and 49 matrisome proteins were identified in both tissues (**Table S7**).



386 Proteins associated with cartilage (COL2A1, COL11A1) and tendon (COL12A1) (Zou, et al., 2014)  
387 were significantly more abundant in forelimbs, whereas some basement membrane proteins were higher in  
388 brain (COL4A1, COL4A2, LAMC1) (**Figure 7D**). COL4A5 and COL4A6 were identified exclusively in  
389 brain, which are present as  $\alpha 5(\text{IV})_2\alpha 6(\text{IV})$  heterotrimers in the pia mater basement membrane (Hubert, et  
390 al., 2009). Other ECM proteins critical for formation and maturation of the blood brain barrier (AGRN)  
391 (Barber and Lieth, 1997) were exclusively identified in the brain (**Figure 7E, Table S7**); whereas,  
392 developing cartilage (type IX collagen, matrilins, COMP, CHAD) and skeletal muscle (COL6A6)  
393 matrisome constituents were only found in the forelimb (Ocken, et al., 2020; Acharya, et al., 2014; Hesse,  
394 et al., 2013; Sabatelli, et al., 2012). GO analysis of ECM proteins that were more abundant in, or exclusive  
395 to, brain or forelimb tissues generated neuro- or musculoskeletal-related GO terms, respectively (**Figure**  
396 **7F**). Further, there was low correlation between the forelimb and brain matrisome (**Figure 7G**), suggesting  
397 early differentiation of the ECM by tissue type and function. Taken all together, these results indicated  
398 tissue fractionation combined with LC-MS/MS was able to resolve tissue-specific differences in ECM  
399 composition during development.

400

401 Until now, an open question in the field of limb and musculoskeletal development was the contribution  
402 of the ECM during tissue assembly. Results from our study provide a resource that describes how the  
403 matrisome changes during forelimb development. In addition, we show how modifications of existing  
404 methods enable the identification of the static and newly synthesized matrisome in the developing forelimb.  
405 As the ECM is a critical component of all organ systems, this information will be a valuable guide for future  
406 investigations into the roles of ECM proteins during morphogenesis and growth.

407 **Acknowledgements**

408 The authors would like to thank Dr. Uma Aryal and Victoria Hedrick of the Purdue Proteomics Core and  
409 members of the Calve and Kinzer-Ursem laboratories for helpful comments and discussion. This work was  
410 supported by the National Institutes of Health [R21 AR069248 and R01 AR071359 to S.C. and T.L.K.;  
411 DP2 AT009833 to S.C.].

412

413 **Author Contributions**

414 Conceptualization, K.R.J and S.C.; Methodology, K.R.J., A.M.S., S.N.L., A.R.O., T.L.K, and S.C.;  
415 Validation, K.R.J, S.N.L., and S.C.; Investigation, K.R.J., A.M.S., and S.N.L.; Formal Analysis, K.R.J.,  
416 A.M.S., A.R.O., and S.C.; Writing – Original Draft, K.R.J., S.N.L., and S.C.; Writing – Review & Editing,  
417 K.R.J., A.M.S., S.N.L., A.R.O., T.L.K, and S.C.; Visualization, K.R.J, S.N.L, and S.C.; Supervision, T.L.K.  
418 and S.C.; Project Administration, K.R.J., T.L.K., and S.C.; Funding Acquisition, T.L.K. and S.C.

419

420 **Declaration of Interests**

421 The authors declare no competing interests.

422 **Figure Legends**

423 **Figure 1.** Proteomic analysis of whole murine embryos. **(A)** Tissue fractionation was combined with LC-  
424 MS/MS to analyze E11.5-E14.5 whole embryos ( $n=3$  biological replicates/timepoint). Cytosolic (C),  
425 nuclear (N) and membrane (M) fractions were combined into one CNM fraction. CNM, CS and IN fractions  
426 were analyzed by LC-MS/MS and raw intensities were determined using MaxQuant. **(B)** The distribution  
427 of cellular compartments, as defined by (Saleh, et al., 2019a), in CNM, CS and IN fractions plotted as  
428 average across biological replicates. Two-way ANOVA revealed the percentage of total raw intensities  
429 attributed to the matrisome was significantly different between timepoints ( $p<0.0001$ ) and fractions  
430 ( $p<0.0001$ ). **(C)** The top 5 significant GO “Cellular Component” and “Biological Process” terms generated  
431 from the 50 most abundant proteins within each CNM, CS and IN fraction of E14.5 embryos indicated  
432 successful enrichment of ECM-related GO terms in the IN fraction (see also **Figure S2**).

433  
434 **Figure 2.** Proteomic analysis of developing murine forelimbs. **(A)** Architecture of forelimbs dissected from  
435 embryos and pups (not drawn to scale). **(B)** Tissue fractionation was combined with LC-MS/MS analysis  
436 to investigate matrisome content of CS and IN of E11.5-P35 forelimbs ( $n=3$  biological replicates). **(C)** The  
437 distribution of cellular compartments, plotted as an average percentage of raw intensity, identified in CS  
438 and IN fractions. Two-way ANOVA showed the percentage of matrisome was dependent on timepoint  
439 ( $p<0.0001$ ) and fraction ( $p<0.0001$ ). **(D)** ECM proteins were categorized as defined by (Naba, et al., 2012),  
440 and percentages of raw matrisome intensity were plotted as a function of development. Three-way ANOVA  
441 revealed the distribution of matrisome components was significantly influenced by timepoint and fraction  
442 ( $p<0.0001$ ).

443  
444 **Figure 3.** ECM protein composition varies as a function of murine musculoskeletal development. E11.5-  
445 P35 WT forelimbs were analyzed using LC-MS/MS as described in **Figure 2**. **(A)** LFQ intensities were  
446 normalized and combined from both CS and IN fractions for each timepoint (see **Methods**) and averaged  
447 across biological replicates ( $n=3$ ). Proteins were clustered, based on row z-score, to show dynamics as a

448 function of development. Proteins identified in  $n \geq 2$  biological replicates were included in the heat map  
449 analysis. White boxes signify zero intensity values. **(B)** The ratios of the raw intensities of collagen chains  
450 involved in type I collagen fibrillogenesis significantly varied between timepoints. Statistical differences  
451 were determined for each ratio by one-way ANOVA across timepoints (n.s. denotes  $p > 0.05$ ;  $*p < 0.05$ ;  
452  $***p < 0.001$ ;  $****p < 0.0001$ ) (**Table S3**). **(C, D)** Volcano plots comparing normalized LFQ intensity values  
453 of ECM proteins identified at E12.5 and E14.5 or E14.5 and P35. Grey lines denote  $\geq 2$ -fold change and  
454  $p < 0.05$  (two-tailed t-test). **(E)** Pearson correlation coefficients comparing the matrisome between  
455 timepoints.

456

457 **Figure 4.** The ECM is differentially distributed within musculoskeletal tissues during forelimb  
458 development. **(A)** Normalized combined LFQ intensities from WT E11.5-P35 forelimbs for proteins  
459 selected for immunohistochemistry plotted as average ( $n=3$  biological replicates). Intensity values and one-  
460 way ANOVA statistics for each protein are reported in **Tables S3**. **(B)** Graphical summary of protein  
461 dynamics displayed in **(A)**. The largest value for each protein was set to 1 and the remaining were scaled  
462 to show relative abundance as a function of timepoint. **(C-T)** Cryosections from E11.5-E14.5, P3 and adult  
463 forelimbs were stained with antibodies against: **(C-H, C'-F')** EMILIN1 (green), HSPG2 (red), and myosin  
464 heavy chain, a marker for differentiated skeletal muscle (MY32; blue); **(I-N, I'-L')** type I collagen (COL  
465 I; green), type V collagen (COL V; red), and MY32 (blue); **(O-T, O'-R')** TNC (green), FBN2 (red), and  
466 NID2 (blue). Insets (indicated with ') are a  $3 \times$  enlargement of the region containing the nascent elbow (\*)  
467 for E11.5-E14.5. Scale bars=200  $\mu\text{m}$ . Individual channels and secondary antibody only negative control  
468 panels are shown in **Figures S4-S6**.

469

470 **Figure 5.** Newly synthesized ECM proteins vary during morphogenesis and growth. **(A)** *In vivo* Aha-  
471 tagging, tissue fractionation and enrichment of Aha-labeled ECM proteins were combined with LC-MS/MS  
472 analysis. **(B, C)** Relative percentage of matrisome intensity between unenriched (left) and enriched (right)

473 samples. Data points are the average of  $n=3$  biological replicates. Labels on the left indicate ECM proteins  
474 of interest that were only identified in unenriched samples. Lines connect proteins identified in both  
475 unenriched and enriched samples (labeled on the right). Darker, bolded lines highlight ECM proteins of  
476 interest and \* indicates a significant change ( $p<0.05$ ) in intensity percentage between unenriched and  
477 enriched samples. **(D)** Comparison of identified newly synthesized ECM proteins, both unique and shared,  
478 between E13.5-E13.75 and E13.5-E14.5 timepoints. **(E)** Comparison of identified newly synthesized ECM  
479 proteins, both unique and shared, between P35-P35.25 and P35-P36 timepoints. **(F)** Newly synthesized  
480 ECM proteins, both unique and shared, identified in embryonic and adolescent forelimbs.

481  
482 **Figure 6.** Proteomic analysis of E14.5 *osteogenesis imperfecta murine* (OIM) forelimbs revealed  
483 matrisome composition was disrupted. **(A)** Forelimbs of OIM homozygous mutants ( $Colla2^{OIM}$ ) and WT  
484 littermates ( $Colla2^{WT}$ ) were fractionated and CS and IN fractions were analyzed by LC-MS/MS ( $n=3$   
485 biological replicates). **(B)** Validation of decreased COL1A2 abundance by LC-MS/MS in the IN fractions  
486 of  $Colla2^{OIM}$  and  $Colla2^{WT}$  forelimbs (two-tailed t-test; \*\*\*\* $p<0.0001$ ). **(C)** Pearson correlation  
487 coefficients comparing matrisome compositions of the IN fractions of  $Colla2^{OIM}$  and  $Colla2^{WT}$  forelimbs,  
488 as well as E14.5 WT forelimbs ( $E14.5^{WT}$ ) from **Figures 2** and **3**.  $Colla2^{OIM}$  and  $Colla2^{WT}$  were moderately  
489 correlated, whereas  $Colla2^{WT}$  and  $E14.5^{WT}$  were highly correlated, confirming the reproducibility of the  
490 methodology. **(D)** Volcano plot comparing ECM proteins identified in the IN fraction of  $Colla2^{OIM}$  and  
491  $Colla2^{WT}$  forelimbs. Grey lines denote  $\geq 2$ -fold change and  $p<0.05$  (two-tailed t-test). **(E)** The ratios of  
492 collagen chains associated with type I collagen fibrillogenesis in  $Colla2^{OIM}$  and  $Colla2^{WT}$  forelimbs.  
493 Although the ratios between  $\alpha 1(I):\alpha 2(I)$  and  $\alpha 1(I):\alpha 2(V)$  were significantly different in  $Colla2^{OIM}$   
494 forelimbs (\* $p<0.05$ , two-tailed t-test), the other ratios were not affected by the mutation.

495  
496 **Figure 7.** LC-MS/MS analysis demonstrates the matrisome of the embryonic murine brains and forelimbs  
497 were significantly different. **(A)** LC-MS/MS analysis of CS and IN fractions of E14.5 brain tissue ( $n=3$

498 biological replicates). **(B)** Proteins annotated by cellular compartment and plotted as average percentage of  
499 total raw intensity across biological replicates. B = brain; F = forelimb. **(C)** The distribution of matrisome  
500 classifications, determined by percentage of matrisome raw intensity, was significantly different between  
501 tissues ( $p < 0.0001$ , two-way ANOVA). **(D)** Volcano plot of ECM proteins identified in the IN fraction of  
502 brain and forelimb tissues. Grey lines denote  $\geq 2$ -fold change and  $p < 0.05$ . **(E)** List of select ECM proteins,  
503 exclusively identified in the brain or forelimb, grouped by biological function to highlight distinct  
504 matrisome components of each tissue. **(F)** Select GO terms associated with ECM proteins more abundant  
505 or exclusively identified in forelimb and brain tissues (**Table S7**). **(G)** Comparison of Pearson correlation  
506 coefficients revealed differences in the matrisome identified in the IN fractions of brain and forelimb  
507 tissues.

508  
509 **Figure S1.** Proteomic analysis of fractionated E12.5 whole murine embryos. **(A)** Experimental workflow  
510 combining tissue fractionation with LC-MS/MS to investigate the matrisome coverage in each fraction. **(B)**  
511 The distribution of protein IDs and raw protein intensities, categorized by cellular compartment as defined  
512 by (Saleh, et al., 2019a), in homogenate, cytosolic (C), nuclear (N), membrane (M), cytoskeletal (CS) and  
513 insoluble (IN) fractions. There was minimal matrisome identification prior to tissue fractionation (average,  
514  $n=2$  biological replicates).

515  
516 **Figure S2.** Unbiased hierarchal clustering of proteins identified in fractionated murine embryos. The 50  
517 most abundant proteins in the cytosolic/nuclear/membrane (CNM), cytoskeletal (CS) and insoluble (IN)  
518 fractions of E14.5 embryos are shown. The row z-score was calculated across all timepoints and fractions  
519 for each protein. Unbiased clustering analysis, based on Pearson Correlation coefficients, showed that the  
520 majority of matrisome proteins (green text) were identified in the IN fraction. White boxes signify zero  
521 intensity values. Each column represents a biological replicate, with  $n=3$  replicates per timepoint.

522

523 **Figure S3.** Comparative analysis of matrisome dynamics between fraction specific and combined LC-  
524 MS/MS LFQ intensities. **(A)** The number of ECM proteins identified exclusively in CS or IN fractions or  
525 distributed across both. **(B)** The average amount of total protein (black) and matrisome (grey) in one  
526 forelimb. Two-way ANOVA revealed the amount of total protein and matrisome content significantly  
527 increased as a function of development ( $p < 0.0001$ ). **(C)** Row z-scores were calculated for the normalized  
528 LFQ intensities in the CS (top) and IN (middle) fractions, separately, and clustered based on matrisome  
529 classification. By combining CS and IN intensities (bottom), the number of ECM protein identifications  
530 increased, but overall matrisome dynamics did not change. **(D)** The percentage of combined LFQ intensity  
531 **(C, bottom)** from the IN fraction **(C, middle)** indicates that there are differences in the amount of each ECM  
532 protein extracted in the CS fraction. Percentages were plotted as the average across biological replicates.  
533 Grey boxes denote protein intensities identified exclusively in the CS fraction **(C, top)**. **(E)** LFQ intensities  
534 of ECM proteins quantified in CS and IN fractions were normalized individually (top and middle), then  
535 combined (bottom; see **Methods**). For heat map analysis, intensities were  $\log_{10}$ -transformed and plotted as  
536 the average of  $n=3$  biological replicates. White boxes denote that protein was not identified at that  
537 timepoint.

538  
539 **Figure S4.** Spatiotemporal distribution of elastin microfibril interfacier 1 (EMILIN1) and perlecan (HSPG2)  
540 during forelimb development show differential patterning of proteins. **(A-DD)** Cryosections from E11.5-  
541 E14.5, P3 and adult were stained with antibodies against: **(A-F, A'-D')** EMILIN1 (green); **(G-L, G'-J')**  
542 perlecan (HSPG2; red); **(M-R, M'-P')** myosin heavy chain, a marker for differentiated skeletal muscle  
543 (MY32; blue); **(S-X, S'-V')** merge (green, red and blue); and **(Y-AD, Y'-AB')** merge with DAPI (grey).  
544 **(EE-OO)** Secondary antibody only negative controls: **(EE-JJ)** merge; and **(KK-OO)** merge with DAPI.  
545 Insets (indicated with ') are a 3 $\times$  enlargement of the forelimb containing the nascent elbow for E11.5-E14.5  
546 at the location indicated with \*. Scale bars = 200  $\mu\text{m}$ .

547 **Figure S5.** Spatiotemporal distribution of collagens, type I and V, during forelimb development show  
548 differential patterning of proteins. **(A-BB)** Cryosections from E11.5 – E14.5, P3 and adult were stained

549 with antibodies against: **(A-F, A'-D')** type I collagen (COL I; green); **(G-L, G'-J')** type V collagen (COL  
550 V; red); **(M-R, M'-P')** myosin heavy chain, a marker for differentiated skeletal muscle (MY32; blue); **(S-**  
551 **X, S'-V')** merge (green, red, blue); and **(Y-DD, Y'-BB')** merge with DAPI (grey). **(EE-OO)** Secondary  
552 antibody only negative controls: **(EE-JJ)** merge; and **(KK-OO)** merge with DAPI. Insets (indicated with  
553 ') are a 3× enlargement of the region containing the nascent elbow (\*) for E11.5-E14.5. Scale bars=200  
554 μm.

555

556 **Figure S6.** Spatiotemporal distribution of tenascin-C, fibrillin-2 and nidogen-2 during forelimb  
557 development show differential patterning of proteins. **(A-BB)** Cryosections from E11.5 – E14.5, P3 and  
558 adult were stained with antibodies against: **(A-F, A'-D')** tenascin-C (TNC; green); **(G-L, G'-J')** fibrillin-2  
559 (FBN2; red); **(M-R, M'-P')** nidogen-2 (NID2; blue); **(S-X, S'-V')** merge (green, red, blue); and **(Y-DD,**  
560 **Y'-BB')** merge with DAPI (grey). **(EE-OO)** Secondary antibody only negative controls: **(EE-JJ)** merge;  
561 and **(KK-OO)** merge with DAPI. Insets (indicated with ') **(R')** NID2 and **(X')** TNC/FBN2/NID2 merge  
562 channels showed punctate staining (arrow) of NID2 in the adult. White box in **(R)** and **(X)** highlighted the  
563 inset location. Other insets are a 3× enlargement of the region containing the nascent elbow (\*) for E11.5–  
564 E14.5. Scale bars=200 μm.

565

566 **Figure S7.** Workflow of data analysis.



567 **STAR Methods**

568

569 **KEY RESOURCES TABLE**

| <b>REAGENT or RESOURCE</b>                                                         | <b>SOURCE</b>               | <b>IDENTIFIER</b>                    |
|------------------------------------------------------------------------------------|-----------------------------|--------------------------------------|
| <b>Antibodies</b> (dilutions can be found in <b>Table S4</b> )                     |                             |                                      |
| Rabbit polyclonal anti-type I collagen                                             | Millipore                   | Cat# AB765P<br>RRID: AB_92259        |
| Goat polyclonal anti-type V collagen                                               | Southern Biotech            | Cat# 1350-01<br>RRID: AB_2794740     |
| Mouse IgG1 monoclonal anti-skeletal muscle myosin heavy chain (MY32; clone MYSN02) | Thermo Fisher Scientific    | Cat# MA5-11748<br>RRID: AB_10979315  |
| Rat monoclonal anti-tenascin C (TNC; clone 578)                                    | R & D Systems               | Cat# MAB2138<br>RRID: AB_2203818     |
| Rabbit polyclonal anti-fibrillin 2 (FBN2)                                          | Gift from Dr. Robert Mecham | (Beene, et al., 2013)                |
| Mouse IgG1 $\kappa$ monoclonal anti-nidogen-2 (NID2, clone F-2)                    | Santa Cruz Biotechnology    | Cat# sc-377424<br>RRID: AB_2819357   |
| Rabbit polyclonal anti-EMILIN1                                                     | Novus Biologicals           | Cat# NBP1-84127<br>RRID: AB_11037041 |
| Rat monoclonal perlecan (HSPG2; clone A7L6)                                        | Santa Cruz Biotechnology    | Cat# sc-33707<br>RRID: AB_627714     |
| Alexa Fluor 488-conjugated goat anti-rabbit secondary antibody                     | Thermo Fisher Scientific    | Cat# A-11034<br>RRID: AB_2576217     |
| Alexa Fluor 488-conjugated donkey anti-rat secondary antibody                      | Thermo Fisher Scientific    | Cat# A-21208<br>RRID: AB_2535794     |
| Alexa Fluor 546-conjugated goat anti-mouse IgG1 secondary antibody                 | Thermo Fisher Scientific    | Cat# A-21123<br>RRID: AB_2535765     |
| Alexa Fluor 555-conjugated donkey anti-goat secondary antibody                     | Thermo Fisher Scientific    | Cat# A-21432<br>RRID: AB_2535853     |
| Alexa Fluor 633-conjugated goat anti-mouse IgG1 secondary antibody                 | Thermo Fisher Scientific    | Cat# A-21126<br>RRID: AB_2535768     |
| Alexa Fluor 647-conjugated donkey anti-rabbit secondary antibody                   | Thermo Fisher Scientific    | Cat# A-31573<br>RRID: AB_2536183     |
| <b>Deposited Data</b>                                                              |                             |                                      |
| Mass spectrometry proteomics data                                                  | This paper                  | MassIVE: MSV000085556                |
| <b>Experimental Models: Organisms/Strains</b>                                      |                             |                                      |
| <i>Mus musculus</i> : C57BL/6J (WT)                                                | The Jackson Laboratory      | Stock #: 000664                      |

|                                                                              |                               |                     |
|------------------------------------------------------------------------------|-------------------------------|---------------------|
| <i>Mus musculus</i> : B6C3Fe a/a- <i>Colla2</i> <sup>0IM/J</sup><br>(COL1A2) | The Jackson<br>Laboratory     | Stock #: 001815     |
| <b>Software</b>                                                              |                               |                     |
| Fiji Software                                                                | (Schindelin, et al.,<br>2012) |                     |
| Illustrator                                                                  | Adobe                         | v. 2019             |
| Photoshop                                                                    | Adobe                         | v. 2019             |
| Excel                                                                        | Microsoft                     | v. 2020             |
| Prism                                                                        | GraphPad                      | v. 8.3.1            |
| Perseus                                                                      | (Tyanova, et al.,<br>2016)    |                     |
| MaxQuant                                                                     | (Cox and Mann,<br>2008)       | v. 1.6.1.0          |
| <b>Chemicals, Peptides and Recombinant Proteins</b>                          |                               |                     |
| L-azidohomoalanine                                                           | Click Chemistry<br>Tools      | Catalog #: 1066     |
| Halt Protease Inhibitor Cocktail (100×)                                      | Thermo Fisher<br>Scientific   | Catalog #: 78429    |
| Chondroitinase ABC from <i>Proteus vulgaris</i>                              | Sigma-Aldrich                 | Catalog #: C3667    |
| Diazo Biotin Alkyne                                                          | Click Chemistry<br>Tools      | Catalog #: 1042     |
| THPTA (tris(3-<br>hydroxypropyltriazolylmethyl)amine)                        | Click Chemistry<br>Tools      | Catalog #: 1010     |
| Pierce NeutrAvidin Agarose                                                   | Thermo Fisher<br>Scientific   | Catalog #: 29200    |
| Endoproteinase LysC                                                          | New England<br>Biolabs        | Catalog #: P8109S   |
| Pierce Trypsin Protease, MS Grade                                            | Thermo Fisher<br>Scientific   | Catalog #: 90057    |
| Pierce Detergent Removal Spin Columns                                        | Thermo Fisher<br>Scientific   | Catalog #: 87777    |
| C-18 MicroSpin columns                                                       | The Nest Group,<br>Inc.       | Catalog #: SS18V    |
| Mouse on Mouse (MOM) Basic Kit                                               | Vector Laboratories           | Catalog #: BMK-2202 |
| ImmEdge pen                                                                  | Vector Laboratories           | Catalog #: H-4000   |
| Fluoromount G                                                                | SouthernBiotech               | Catalog #: 0100-01  |
| <b>Critical Commercial Assays</b>                                            |                               |                     |
| Compartment Protein Extraction Kit                                           | Millipore EMD                 | Catalog #: 2145     |

|                                                             |                          |                                                                                       |
|-------------------------------------------------------------|--------------------------|---------------------------------------------------------------------------------------|
| Pierce 660 nm Protein Assay                                 | Thermo Fisher Scientific | Catalog #: 22662                                                                      |
| Pierce Quantitative Colorimetric Peptide Assay              | Thermo Fisher Scientific | Catalog #: 23275                                                                      |
|                                                             |                          |                                                                                       |
| <b>Other</b>                                                |                          |                                                                                       |
| TissueRuptor                                                | Qiagen                   | <a href="https://www.qiagen.com/us">https://www.qiagen.com/us</a>                     |
| CentriVap Benchtop Vacuum Concentrator                      | Labconoco                | <a href="https://www.labconco.com/">https://www.labconco.com/</a>                     |
| Branson Ultrasonics Sonifier S-450A                         | Fisher Scientific        | Catalog #: 22-309783                                                                  |
| ThermoMixer, F1.5                                           | Eppendorf                | Catalog #: 5384000020                                                                 |
| Q Exactive™ HF Hybrid Quadrupole-Orbitrap Mass Spectrometer | Thermo Fisher Scientific | Catalog #: IQLAAEGAAPFAALGMBFZ                                                        |
| Shandon Cryotome FE                                         | Thermo Fisher Scientific | Catalog #: A78910100                                                                  |
| Leica DMI6000 Microscope                                    | Leica Microsystems       | <a href="https://www.leica-microsystems.com/">https://www.leica-microsystems.com/</a> |

570

## 571 **RESOURCE AVAILABILITY**

### 572 *Lead Contact*

573 Further information and requests for resources and reagents should be directed to and will be fulfilled  
574 by the Lead Contact, Sarah Calve ([sarah.calve@colorado.edu](mailto:sarah.calve@colorado.edu)).

575

### 576 *Materials Availability*

577 This study did not generate new unique reagents or mouse lines.

578

### 579 *Data and Code Availability*

580 The RAW data files generated during this study are available at MassIVE, MSV000085556.

581

## 582 **EXPERIMENTAL MODEL AND SUBJECT DETAILS**

583 All experimental protocols were performed in accordance with the guidelines established by the Purdue  
584 Animal Care and Use Committee, and all methods were approved by this committee (PACUC; protocol#  
585 1209000723). PACUC ensures that all animal programs, procedures, and facilities at Purdue University

586 adhere to the policies, recommendations, guidelines, and regulations of the USDA and the United States  
587 Public Health Service in accordance with the Animal Welfare Act and Purdue's Animal Welfare Assurance.

588 Wild-type (WT) C57BL/6J and B6C3Fe *α-Coll1a2<sup>OIM</sup>/J* (COL1A2)(Chipman, et al., 1993) mice were  
589 obtained from The Jackson Laboratory. For all *in vivo* studies (timed-mating), the sex of the embryos was  
590 not determined prior to analysis. Female mice were time-mated, where noon of the day a copulation plug  
591 was found was considered to be embryonic day (E)0.5. All mice were euthanized via CO<sub>2</sub> inhalation,  
592 followed by cervical dislocation, with the exception of post-natal day (P)3 pups in which decapitation was  
593 used.

594

## 595 **METHOD DETAILS**

### 596 *Experimental Groups: Tissue Collection*

#### 597 *WT whole embryos*

598 Embryos were collected at embryonic day (E) 11.5 through E14.5, weighed (see **Tables S1, S2**), snap  
599 frozen, and stored at -80°C.

600

#### 601 *WT forelimbs*

602 Mouse forelimbs were microdissected away from embryos, taking care to maintain the musculoskeletal  
603 structures from the scapula to the digit tips. Forelimbs were isolated from E11.5-E14.5 embryos, P3 pups  
604 and P35 mice, weighed (see **Table S3**), snap frozen and stored at -80°C. Forelimbs were predominantly  
605 comprised of developing musculoskeletal tissue with the exception of the skin. For E11.5-E14.5, the skin  
606 was left on the forelimbs since it made up less than 1% of the wet weight and was challenging to remove  
607 while keeping the musculoskeletal tissues intact. The skin was removed from P3 and P35 forelimbs prior  
608 to analysis since it was ~25% of the total wet weight of the tissue and easier to remove (data not shown).  
609 Skin and hair were removed from P3 and P35 forelimbs.

610

#### 611 *Aha-labeled WT forelimbs*

612 The methionine analog L-azidohomoalanine (Aha) was reconstituted in PBS and adjusted to pH 7.4  
613 with NaOH to generate a final stock concentration of 10 mg/mL. Aha stock solutions were sterilized using  
614 0.2  $\mu$ m cellulose acetate membrane filters and stored at -20°C.

615 For embryonic forelimb tissues, WT pregnant dams were injected subcutaneously at the base of the  
616 neck, to avoid piercing the amniotic sac, with Aha (0.1 mg Aha/g mouse) at E13.5 and sterile PBS pH 7.4  
617 was used for control injections (10  $\mu$ L PBS/g mouse). Dams were euthanized and forelimbs were collected  
618 as described above at either E13.75 (6 hours post-injection; hpi) or E14.5 (24 hpi). To collect adolescent  
619 forelimbs, non-pregnant WT female mice were injected at P35 and forelimbs were harvested at P35.25 (6  
620 hours post-injection) or P36 (24 hours post-injection) as described above. Tissues were weighed (see **Table**  
621 **S5**), snap frozen and stored at -80°C.

622

#### 623 *COL1A2 OIM forelimbs*

624 Heterozygous COL1A2 (COL1A2<sup>+/-</sup>) male and female mice were time-mated to obtain COL1A2<sup>+/+</sup>  
625 (COL1A2<sup>WT</sup>) and COL1A2<sup>-/-</sup> (COL1A2<sup>OIM</sup>) embryos. Forelimbs were microdissected away from the embryos  
626 at E14.5, weighed (see **Table S6**), snap frozen and stored at -80°C.

627

#### 628 *WT brains*

629 Mouse brains, including both forebrain and hindbrain, were microdissected away from E14.5 embryos,  
630 weighed (see **Table S7**), snap frozen and stored at -80°C.

631

632 Details regarding the biological replicates of each experimental group for tissue fractionation and proteomic  
633 analysis are listed in **Tables S1-3, 5-7**.

634

#### 635 *Tissue Fractionation*

636 Proteins were extracted from tissues using buffers from the Compartment Protein Extraction Kit as  
637 previously described (Naba, et al., 2015). Briefly, tissues were homogenized (TissueRuptor) in ice-cold C  
638 (cytosolic) buffer and rotated end-over-end for 30 minutes at 4°C. Buffer C, as well as all subsequent buffers  
639 also contained protease inhibitors. Aliquots of E12.5 whole embryo homogenate were collected after initial  
640 homogenization, snap frozen and stored at -80°C. Following incubation, samples were centrifuged for 20  
641 minutes at 16,000 × g. Supernatants were collected (C fraction), snap frozen and stored at -80°C. Pellets  
642 were resuspended with W (wash) buffer and washed by end-over-end rotation at 4°C for 5 minutes. Samples  
643 were centrifuged and supernatants were collected, snap frozen and stored at -80°C. Subsequent incubations  
644 with the N (nuclear) buffer supplemented with 0.1% benzonase (2×) and the M (membrane) buffer (1×),  
645 were 30 minutes at 4°C prior to centrifugation and fraction collection (N and M fractions, respectively).  
646 The final incubation with CS (cytoskeletal) buffer was performed at room temperature for 20 minutes prior  
647 to centrifugation and CS fraction collection. The remaining pellet was considered the insoluble fraction  
648 (IN), and was washed 3× with PBS, snap frozen, and stored at -80°C.

649

### 650 *Protein Quantification of Fractionated Forelimbs*

651 To quantify the amount of protein extracted by each tissue fractionation buffer, another set of E11.5 –  
652 E14.5, P3 and P35 forelimbs were collected and fractionated as described above. IN fractions were  
653 resuspended in 8M urea/100mM ammonium bicarbonate. Protein concentration for each fraction was  
654 measured using the Pierce 660 nm Quantitative Colorimetric Assay and amount of protein in each fraction  
655 per forelimb was calculated using **Eq. 1**

656

**Eq. 1**

$$657 \text{ Amount of Protein}_{fraction,timepoint} = \frac{\text{Concentration}_{fraction,timepoint} * \text{Volume}_{fraction,timepoint}}{\text{Number of pooled forelimbs}_{timepoint}}.$$

658

659 The total amount of protein in each forelimb (**Figure S3B**) was determined by summation of the amount of  
660 protein in all fractions and normalized to the number of forelimbs in each biological replicate.

661

### 662 *Enrichment of Aha-labeled ECM Proteins*

663 To identify the newly synthesized proteins at embryonic and adolescent timepoints, forelimbs labeled  
664 with Aha were fractionated as described above with slight modifications in buffer volumes (**Table S5**). IN  
665 fractions were resuspended in 700 $\mu$ L of Chondroitinase ABC Digestion Buffer (0.1M Tris-HCl, 0.03M  
666 sodium acetate, pH 8) with Halt protease inhibitor cocktail (final concentration 1 $\times$ ). Chondroitinase ABC  
667 was added to each sample (final concentration 0.2U/700 $\mu$ L) and incubated overnight at 37°C with constant  
668 agitation (1000 rpm, ThermoMixer). After incubation, four volumes of 100% acetone were added to each  
669 sample and incubated at -20°C to precipitate proteins. Proteins were pelleted by centrifugation for 20  
670 minutes at 4°C, acetone was removed, and pellets were vacuum dried (Centrivap). Dried pellets were  
671 resuspended in 500 $\mu$ L 8M urea/100mM ammonium bicarbonate and sonicated on ice 4  $\times$  10 seconds using  
672 50% duty cycle and output 3 (Sonifier). Samples were centrifuged at 16,000  $\times$  g for 20 minutes, the  
673 supernatant was transferred to a new tube and protein concentration was measured using the Pierce 660 nm  
674 Quantitative Colorimetric Assay. Aliquots of each supernatant were transferred to a new tube, labeled as  
675 the “Unenriched” fraction for each sample, snap frozen and stored at -80°C until protein digestion.

676 Aha-labeled proteins were enriched as described by (Saleh, et al., 2019a) with slight modifications.  
677 Proteins were first alkylated with iodoacetamide (IAA, final concentration, 39mM) for 30 minutes at RT,  
678 protected from light. After alkylation, click reagents were added individually in the following order: (a)  
679 cleavable diazo biotin-alkyne probe (DBA, final concentration 0.05mM); (b) ligand tris(3-  
680 hydroxypropyltriazolylmethyl)amine (final concentration 10mM); (c) copper sulfate (final concentration  
681 2mM); (d) aminoguanidine (final concentration 20mM); and (e) sodium ascorbate (final concentration  
682 5mM). Click reactions were rotated end-over-end for 3 hours at room temperature, followed by protein  
683 precipitation with acetone.

684 Protein pellets were resuspended in 550 $\mu$ L 4.4M urea/100mM ammonium bicarbonate buffer and  
685 remaining precipitates were pelleted by centrifugation at 16,000  $\times$  g for 20 minutes at room temperature.  
686 Supernatants were added to 200 $\mu$ L of 50% NeutrAvidin bead slurry, previously washed 3  $\times$  1mL of 100mM  
687 ammonium bicarbonate, and rotated end-over-end for 1.5 hours at room temperature. After incubation,  
688 beads were washed 4  $\times$  10 minutes with 1mL of 4M urea and 0.1% sodium dodecyl sulfate (SDS) in 100mM  
689 ammonium bicarbonate and 3 $\times$  for 10 min with 1mL of with 0.1% SDS in PBS (pH 7.4).

690 Bound proteins were eluted by resuspending the beads in 400 $\mu$ L 50mM sodium dithionite with 0.1%  
691 SDS in PBS (pH 7.2) and rotating end-over-end for 1 hour at room temperature protected from light. The  
692 elution fraction was collected by centrifugation for 2 minutes at 1,200  $\times$  g. The elution step was repeated  
693 two more times and fractions were combined for the “Enriched” sample. Enriched proteins were  
694 precipitated with acetone, snap frozen and stored at -80°C.

695 Enriched and Unenriched samples were processed for LC-MS/MS analysis as delineated above. The  
696 peptide concentrations of the Enriched samples were normalized such that the most concentrated Aha  
697 sample of each condition (E13.75, E14.5, P35.25, P36) was diluted to 0.2 mg/mL and equivalent volumes  
698 were added to the remaining Aha and PBS samples. All unenriched samples were normalized to 0.2 mg/mL.

699

## 700 ***Liquid Chromatography Tandem Mass Spectrometry (LC-MS/MS) Analysis***

### 701 *Fractions analyzed for each experimental group*

702 For E12.5 whole embryos, homogenates, C, N, M, CS and IN fractions were analyzed by LC-MS/MS.  
703 For E11.5 – E14.5 whole embryos C, N and M fractions were combined into one CNM sample before LC-  
704 MS/MS analysis. CNM, CS and IN fractions were analyzed by LC-MS/MS. For E11.5 – E14.5, P3 and P35  
705 forelimbs, CS and IN fractions were analyzed by LC-MS/MS. For Aha-labeling experiments, enriched and  
706 unenriched samples from E13.75, E14.5, P35.25 and P36 timepoints were analyzed by LC-MS/MS. For  
707 E14.5 *Colla2*<sup>WT</sup> and *Colla2*<sup>OIM</sup> forelimbs, CS and IN fractions were analyzed by LC-MS/MS. For E14.5  
708 brains, CS and IN fractions were analyzed by LC-MS/MS.



709

710 *Enzymatic digestion of proteins*

711 IN fractions and enriched samples were resuspended in 8M urea/100mM ammonium bicarbonate and  
712 reduced with dithiothreitol (DTT, final concentration 10mM) for 2 hours at 37°C with constant agitation.  
713 All other fractions and samples were diluted 1:2 with 8M urea in 100mM ammonium bicarbonate and  
714 reduced with DTT. Samples were brought to room temperature prior to alkylation with IAA (final  
715 concentration 25mM) for 30 minutes in the dark. Samples were diluted to 2M urea with 100mM ammonium  
716 bicarbonate and deglycosylated with 0.1U/200µL chondroitinase ABC for 2 hours at 37°C with constant  
717 agitation. Proteins were then digested into peptides by three enzymatic steps at 37°C with constant agitation:  
718 (1) endoproteinase LysC (1µg/200µL) for 2 hours; (2) MS-grade trypsin (3µg/200µL) overnight; and (3)  
719 MS-grade trypsin (1.5µg/200µL) for an additional 2 hours. Digestion enzymes were inactivated by  
720 acidification (trifluoroacetic acid, TFA, final concentration 0.1%).

721 Detergent contamination was removed from samples derived from M, CS and IN fractions using Pierce  
722 Detergent Removal Spin Columns per the manufacturer's protocol. All samples were desalted using C-18  
723 MicroSpin columns. Briefly, columns were prepared with 100% acetonitrile (ACN) and HPLC-grade  
724 water/0.1% TFA. Peptides were then added to the columns and washed with two 100µL volumes of  
725 water/0.1% TFA before elution with 50µL of 80% ACN/25mM formic acid (FA). After elution, samples  
726 were dried at 45°C for 4 hours and peptides were resuspended in 10µL of 3% ACN/0.1% FA. Peptide  
727 concentration was measured using the Pierce 660 nm Quantitative Colorimetric Assay. Peptide  
728 concentrations for all fractions were normalized to 1 µg/µL with 3% ACN/0.1% FA.

729

730 *LC-MS/MS*

731 Samples were analyzed using the Dionex UltiMate 3000 RSLC Nano System coupled to the Q  
732 Exactive™ HF Hybrid Quadrupole-Orbitrap Mass Spectrometer. Following digestion and clean up, 1µg of  
733 peptide was loaded onto a 300µm i.d. × 5mm C18 PepMap™ 100 trap column and washed for 5 minutes

734 using 98% purified water/2% ACN/0.01% FA at a flow rate of 5  $\mu$ L/minute. After washing, the trap column  
735 was switched in-line with a 75  $\mu$ m  $\times$  50 cm reverse phase Acclaim<sup>TM</sup> C18 PepMap<sup>TM</sup> 100 analytical column  
736 heated to 50°C. Peptides were separated using a 120 minute gradient elution method at a flow rate of 300  
737 nL/minute. Mobile phase A consisted of 0.01% FA in water while mobile phase B consisted of 0.01% FA  
738 in 80% ACN. The linear gradient started at 2% B and reached 10% B in 5 minutes, 30% B in 80 minutes,  
739 45% B in 91 minutes, and 100% B in 93 minutes. The column was held at 100% B for the next 5 minutes  
740 before being brought back to 2% B and held for 20 minutes. Samples were injected into the QE HF through  
741 the Nanospray Flex<sup>TM</sup> Ion Source fitted with an emission tip (New Objective). Data acquisition was  
742 performed monitoring the top 20 precursors at 120,000 resolution with an injection time of 100 ms.

743

#### 744 *Forelimb Tissue Preparation for Immunohistochemistry (IHC)*

745 Microdissected forelimbs from E11.5 – E14.5, P3 and adult (between 6 – 20 weeks) mice were either  
746 directly embedded in optimal cutting temperature (OCT) compound or processed as follows based on  
747 antibody compatibility (see **Table S4**). Forelimbs were incubated in 4% paraformaldehyde (PFA) in PBS  
748 for 2 – 4 hours at room temperature, washed in PBS, and incubated overnight at 4°C in sucrose solution (23  
749 wt/wt % solution of sucrose in PBS with 0.02% sodium azide). Forelimbs were incubated in a 50%  
750 OCT:50% sucrose solution for 30 minutes before transferring to a mold containing OCT. Samples were  
751 frozen with dry ice-cooled isopentane and stored at -80°C. Sections of 10  $\mu$ m forelimb tissue were acquired  
752 using a Shandon Cryotome FE, adhered to charged slides and stored at -20°C.

753

#### 754 *IHC Analysis*

755 Incubations were conducted at room temperature unless indicated otherwise (**Table S4**) and samples  
756 were protected from light when fluorescent secondary staining reagents were used. Tissue sections were  
757 equilibrated to room temperature, encircled using an ImmEdge pen, rehydrated in PBS for 10-15 minutes,  
758 fixed with 4% PFA for 5 minutes and washed in PBS. Sections were permeabilized with 0.1% Triton-100

759 in PBS for 5 minutes and rinsed briefly with PBS prior to blocking for 1 hour with IgG blocking buffer  
760 from the Mouse on Mouse (MOM) Basic Kit following manufacturer's instructions. Tissues were washed  
761  $3 \times 2$  minutes with PBS and blocked for 5 minutes with protein diluent from the MOM Basic kit. Primary  
762 antibodies, in solution with the MOM protein diluent, were applied to tissues for varying times and  
763 concentrations (indicated by **Tables S4**), then washed  $3 \times 2$  minutes with PBS.

764 Secondary antibodies and DAPI for NID2/FBN2/TNC and EMILIN1/HSPG2/MY32 combinations  
765 were applied to tissue in a solution of MOM protein diluent for times and concentrations indicated in **Table**  
766 **S4**. Slides were washed  $3 \times 2$  minutes with PBS. For the COL I/COL V/MY32 combination, sequential  
767 staining was performed due to incompatibilities between secondary antibodies (**Table S4**). Tissues were  
768 incubated in MOM protein diluent for 5 minutes, followed by a solution of donkey anti-goat secondary in  
769 MOM protein diluent and DAPI for times and concentrations indicated in **Table S4**. Slides were washed  $3$   
770  $\times 2$  minutes with PBS and incubated for 5 minutes with MOM protein diluent. Secondary antibody solution  
771 of goat anti-mouse, rabbit, and DAPI were applied to tissue as described in **Table S4**. Slides were washed  
772  $3 \times 2$  minutes with PBS.

773

#### 774 ***Imaging Analysis***

775 Coverslips were mounted using FluoromountG and sealed with clear nail polish. Slides were stored at  
776  $4^{\circ}\text{C}$  until imaged with a Leica DMI6000 at  $20\times$  magnification. Images were processed and compiled using  
777 Fiji Software and Adobe Photoshop, respectively, and exposure settings were consistent between the sample  
778 and negative controls for individual timepoints.

779

#### 780 **QUANTIFICATION AND STATISTICAL ANALYSIS**

781 When appropriate, statistical tests and number of biological replicates used for each graphical analysis  
782 are reported in the figure legends or supplemental tables. Statistical significance was determined by  $p < 0.05$   
783 for two tailed t-tests or one- or two-way ANOVAs. Error bars and  $\pm$  values report the standard deviation of

784 the mean. Data processing was conducted with Microsoft Excel (for filtering and data handling), Perseus  
785 (for clustering analysis) (Tyanova, et al., 2016), GraphPad Prism 8 (for data visualization and statistical  
786 analysis), and Adobe Illustrator/Photoshop (for figure compilation).

787

### 788 ***LC-MS/MS Data Processing***

789 Raw files were analyzed with MaxQuant (Cox and Mann, 2008). Default settings were used unless  
790 noted otherwise (**Tables S1-3, 5-7**). Peak lists were searched against the *Mus musculus* UniProt FASTA  
791 database (November 2018). In Aha-enrichment of NSPs experiments, peak lists were also searched against  
792 the *Gallus gallus* Avidin FASTA protein sequence (May 2018). Match-between-runs was enabled between  
793 biological replicates. Cysteine carbamidomethylation was included as a fixed modification and variable  
794 modifications included oxidation of methionine, hydroxylysine, hydroxyproline, deamidation of  
795 asparagine, and conversion of glutamine to pyro-glutamic acid. In Aha-enrichment of NSPs experiments,  
796 two additional modifications were included: Aha substitution for methionine and cleaved DBA-tagged Aha  
797 substitution for methionine. Peptide and protein false discovery rates were set to 0.01 and determined by a  
798 reverse decoy database derived from the *Mus musculus* database.

799

### 800 ***Proteomic Data Analysis***

801 Proteins that were identified by one unique or razor peptide across all samples, or labeled as a potential  
802 contaminant or reverse hit, were filtered from the data set. Further, proteins were removed if an intensity  
803 value was only found in one biological replicate within an experimental group. After filtration, proteins  
804 were classified into Cellular Compartments (CC): cytosolic, nuclear, membrane, cytoskeletal and  
805 matrisome (Saleh, et al., 2019a; Naba, et al., 2012). ECM proteins were further categorized into Matrisome  
806 Classifications (MCs): secreted factors, ECM regulators, ECM-affiliated proteins, ECM glycoproteins,  
807 proteoglycans and collagens (Naba, et al., 2012).

808 For whole WT embryos (**Tables S1, S2**), WT forelimbs (**Table S3**), OIM forelimbs (**Table S6**) and  
809 WT brain (**Table S7**) analyses, label free quantification (LFQ) was employed to compare protein intensities

810 (LFQ intensities) across samples, while raw intensities were used for intrasample comparisons. In the Aha-  
811 enrichment analysis (**Table S5**), raw intensities were used to identify newly synthesized ECM proteins and  
812 corresponding data analysis. Raw and LFQ intensities were normalized for each analysis as delineated  
813 below. An overview of each proteomic data workflow is shown in **Figure S7**.

814

#### 815 *Cellular compartment and matrisome classification percentages*

816 The percentage of each CC in a sample was calculated by **Eq. 2**,

817

818 **Eq. 2** 
$$\% \text{ of Raw Intensity}_{CC, fraction, timepoint} = \frac{\sum \text{Raw Intensity}_{CC, fraction, timepoint}}{\sum \text{Raw Intensity}_{fraction, timepoint}}$$

819

820 and values were averaged across biological replicates prior to graphical analysis (**Figures S1B, 1B, 2C,**  
821 **7B**). The distribution of MCs at each timepoint were calculated by **Eq. 3**,

822

823 **Eq. 3** 
$$\% \text{ of Raw Matrisome Intensity}_{MC, fraction, timepoint} = \frac{\sum \text{Raw Intensity}_{MC, fraction, timepoint}}{\sum \text{Raw Intensity}_{matrisome, fraction, timepoint}}$$

824 and values were averaged across biological replicates prior to graphical analysis (**Figures 2D, 7C**).

825

#### 826 *Intrasample collagen isoform ratios*

827 Raw intensities (normalization was experiment-specific, see sections below or **Figure S7**) were used for  
828 intrasample comparisons (**Figures 3B, 6E**). One-way ANOVA was used to determine significant  
829 differences between ratios (**Tables S3, S6**).

830

#### 831 *Volcano plot analysis*

832 For subsequent volcano plot analyses (**Figures 3C, 3D, 6D and 7D**), LFQ protein intensities (normalization  
833 was experiment-specific, see sections below or **Figure S7**) were log<sub>2</sub> transformed and averaged across

834 biological replicates. The fold change and  $p$ -values from corresponding two-tailed t-tests were plotted to  
835 compare matrixome composition.

836

#### 837 *Whole embryo quantitative analysis*

838 For Gene Ontology (GO) analysis of E14.5 whole embryos (**Figure 1C**), terms associated with the 50  
839 most abundant proteins in the CNM, CS and IN fractions of E14.5 whole embryos were determined using  
840 g:Profiler (Raudvere, et al., 2019). The top five enriched “Cellular Component” and “Biological Process”  
841 GO terms from each list, along with the  $-\log_{10}(p\text{-value})$  were reported. Terms that had a lower ranking in  
842 the GO analysis of a specific fraction but were top five in another fraction were also included.

843 To view enrichment of ECM proteins in E14.5 embryos (**Figure S2**), the same proteins were used in  
844 unbiased clustering heat map analysis. Row z-scores for LFQ intensities were calculated across all  
845 timepoints and proteins were subjected to unbiased clustering (Euclidean) for heatmap analysis using  
846 Perseus.

847

#### 848 *Forelimb quantitative analysis*

849 Many of the ECM proteins identified in E11.5 - E14.5, P3 and P35 forelimbs were present in both CS  
850 and IN fractions (**Figure S3A**). To evaluate the effects of combining intensities from CS and IN fractions  
851 on observed proteomic trends, LFQ intensities of ECM proteins in the CS and IN fractions were normalized  
852 to adjust intensities to reflect equivalent amounts of ECM in each fraction using **Eq. 4**,

853

#### Eq. 4

$$854 \quad \text{Normalized LFQ Intensity}_{\text{protein,fraction,sample}} = \frac{\text{LFQ Intensity}_{\text{protein,fraction,sample}}}{\% \text{ of Raw Intensity}_{\text{matrixome,fraction,sample}}}$$

855

856 Normalized LFQ intensities for CS and IN samples (**Figure S3C**, top, middle) were used to compare protein  
857 trends from combined IN and CS LFQ intensities (**Figure S3C**, bottom).

858 Matrisome intensities were combined such that the ratio between protein content was maintained. LFQ  
859 intensity values were assumed representative of 1 µg of sample was loaded; therefore, to combine individual  
860 protein intensities from CS and IN fractions, intensities were scaled to reflect the total amount of protein in  
861 that fraction by **Eq. 5**.

862

863 **Eq. 5** 
$$\text{Scaled LFQ Intensity}_{fraction,timepoint} =$$
  
864 
$$\text{LFQ Intensity}_{fraction,timepoint} * \text{Amount of Protein}_{fraction,sample}$$

865

866 LFQ intensities were then added using **Eq. 6**, with assumption that the scaled LFQ signal is additive based  
867 on the peptides compared,

868

869 **Eq. 6** 
$$\text{Combined LFQ Intensity}_{protein,timepoint} =$$
  
870 
$$\text{Scaled LFQ Intensity}_{protein,CS,timepoint} + \text{Scaled LFQ Intensity}_{protein,IN,timepoint}$$

871

872 Combined LFQ protein intensities were then normalized to be representative of equivalent amounts of ECM  
873 across timepoints by **Eq. 7**,

874

875 **Eq. 7** 
$$\text{Normalized Combined LFQ Intensity}_{protein,timepoint} = \frac{\text{Combined LFQ Intensity}_{protein,time point}}{\text{Total Amount of ECM}_{forelimb,timepoint}}$$

876

877 The total amount of ECM per forelimb (**Figure S3B**) was determined using the amount of protein  
878 (calculated by **Eq. 1**) and the percentage of matrisome in the CS and IN fractions (calculated by **Eq. 2**),  
879 shown in **Eq. 8**,

880

**Eq. 8**

$$\begin{aligned} 881 \quad & \text{Total Amount of ECM}_{\text{forelimb,timepoint}} \\ 882 \quad & = (\text{Amount of Protein}_{\text{CS,timepoint}} * \% \text{ of Raw Intensity}_{\text{matrisome,CS,timepoint}} \\ 883 \quad & + \text{Amount of Protein}_{\text{IN,timepoint}} \\ 884 \quad & * \% \text{ of Raw Intensity}_{\text{matrisome,IN,timepoint}}) / \text{Number of Forelimbs}_{\text{timepoint}} \end{aligned}$$

885

886 To resolve the relative amounts of ECM protein intensity in CS and IN fractions, separately, additional  
887 heat maps were generated using  $-\log_{10}$  transformed scaled LFQ intensities (**Eq. 5, Figure S3E**, top and  
888 middle). The percentage of combined LFQ intensity (**Figure S3E**, bottom) attributed to the IN fraction was  
889 plotted as a heat map (**Figure S3D**) to reveal which matrisome classifications were more prominent in the  
890 IN fraction.

891 Normalized combined LFQ intensities were used for subsequent WT forelimb graphical and statistical  
892 analyses, unless otherwise noted (see **Figure S7**).

893 To visualize matrisome dynamics as a function of development, row z-scores were calculated for each  
894 ECM protein and averaged across biological replicates. ECM proteins were arranged in a heat map (**Figure**  
895 **3A**) to show protein dynamics during morphogenesis and growth. Volcano plot analysis (**Figures 3B, C**)  
896 and Pearson correlation coefficients heat maps (**Figure 3D**) were used to further ascertain differences in  
897 ECM composition between timepoints.

898 To determine the abundance ratios between specific collagen isoforms (**Figure 3E**), raw intensities  
899 were combined and normalized, as delineated above for LFQ intensities (**Eqs. 2, 4-8, Figure S7**), and used.  
900 Ratios were  $\log_{10}$  transformed, averaged across biological replicates and plotted.

901

#### 902 *Aha-enriched ECM proteins quantitative analysis*

903 The newly synthesized matrisome was identified as ECM proteins that were (1) exclusive to Aha-  
904 labeled samples, or (2) the fold change of raw intensity in Aha-labeled samples, compared to negative



905 (PBS) control, was  $>2$  and  $p < 0.05$ . The relative percentage of matrisome intensity for each ECM protein  
906 was calculated for unenriched and enriched samples by **Eq. 9**,

$$907 \quad \text{Percentage of matrisome intensity}_{ECM \text{ protein, sample}} = \frac{\text{Raw Intensity}_{ECM \text{ protein, sample}}}{\sum \text{Raw Intensity}_{\text{matrisome, sample}}}$$

908 Relative percentages in enriched samples were compared to unenriched using two-sided t-tests where  $p <$   
909  $0.05$  was significant. Percentages for unenriched and enriched samples were plotted as an average across  
910 biological replicates (**Figure 5B, C**).

911

#### 912 *COL1A2 OIM forelimbs quantitative analysis*

913 Previous analysis of WT forelimbs revealed minimal changes in protein trends after combining CS and  
914 IN intensities; therefore, we analyzed CS and IN fractions separately for comparative analysis of *Colla2*<sup>WT</sup>  
915 and *Colla2*<sup>OIM</sup> forelimbs. After protein filtration, LFQ intensities of ECM proteins in the CS and IN  
916 fractions were normalized using **Eq. 2** and **Eq. 4**. Normalized LFQ intensities were used for subsequent  
917 analysis, unless otherwise noted. Pearson correlation coefficient analysis was conducted to determine the  
918 degree of similarity between matrisome composition of *Colla2*<sup>WT</sup>, *Colla2*<sup>OIM</sup> and previously analyzed  
919 E14.5 WT (E14.5<sup>WT</sup>) forelimbs (**Figure 6C**). Volcano plot analysis was used to visualize differences in  
920 ECM protein abundance between phenotypes (**Figure 6D**). Intrasample ratios for specific collagen isoforms  
921 were calculated using raw intensities (**Figure 6E**).

922

#### 923 *Brain and forelimb quantitative analysis*

924 Similar to COL1A2 OIM forelimb quantitative analysis, LFQ intensities in the CS and IN fractions  
925 were normalized using **Eq. 2** and **Eq. 4**. Normalized LFQ intensities were used for volcano plot analysis  
926 (**Figure 7D**) and Pearson correlation coefficients (**Figure 7E**) to identify matrisome differences in  
927 developing WT brain and forelimb tissues. Intrasample ratios for specific collagen isoforms and other ECM  
928 proteins were calculated using raw intensities (**Figure 7F**). GO analysis of E14.5 forelimb and brain tissue  
929 (**Figure 7G**) was conducted using g:Profiler. ECM proteins that were more abundant or exclusive in either

930 the brain or forelimb tissue were analyzed separately, and specific GO terms were reported along with  
931 corresponding  $p$ -values.

932

933

934 **References**

- 935 Acharya, C., Yik, J.H.N., Kishore, A., Van Dinh, V., Di Cesare, P.E., and Haudenschild, D.R.  
936 (2014). Cartilage oligomeric matrix protein and its binding partners in the cartilage extracellular  
937 matrix: Interaction, regulation and role in chondrogenesis. *Matrix Biol.* 37, 102-111.
- 938 Arteaga-Solis, E., Gayraud, B., Lee, S.Y., Shum, L., Sakai, L., and Ramirez, F. (2001).  
939 Regulation of limb patterning by extracellular microfibrils. *J. Cell Biol.* 154, 275-281.
- 940 Asgari, M., Latifi, N., Heris, H.K., Vali, H., and Mongeau, L. (2017). In vitro fibrillogenesis of  
941 tropocollagen type III in collagen type I affects its relative fibrillar topology and mechanics. *Sci.*  
942 *Rep.* 7, 1392.
- 943 Aszodi, A., Hunziker, E.B., Olsen, B.R., and Fassler, R. (2001). The role of collagen II and  
944 cartilage fibril-associated molecules in skeletal development. *Osteoarthritis Cartilage* 9 Suppl A,  
945 S150-9.
- 946 Bailey, A.J., Paul, R.G., and Knott, L. (1998). Mechanisms of maturation and ageing of collagen.  
947 *Mech. Ageing Dev.* 106, 1-56.
- 948 Baralle, F.E., and Giudice, J. (2017). Alternative splicing as a regulator of development and  
949 tissue identity. *Nat. Rev. Mol. Cell Biol.* 18, 437-451.
- 950 Barber, A.J., and Lieth, E. (1997). Agrin accumulates in the brain microvascular basal lamina  
951 during development of the blood-brain barrier. *Dev. Dyn.* 208, 62-74.
- 952 Beene, L.C., Wang, L.W., Hubmacher, D., Keene, D.R., Reinhardt, D.P., Annis, D.S., Mosher,  
953 D.F., Mecham, R.P., Traboulsi, E.I., and Apte, S.S. (2013). Nonselective Assembly of Fibrillin 1  
954 and Fibrillin 2 in the Rodent Ocular Zonule and in Cultured Cells: Implications for Marfan  
955 Syndrome. *Investig. Ophthalmol. Vis. Sci.* 54, 8337-8344.
- 956 Bernardo, B.C., Belluoccio, D., Rowley, L., Little, C.B., Hansen, U., and Bateman, J.F. (2011).  
957 Cartilage intermediate layer protein 2 (CILP-2) is expressed in articular and meniscal cartilage  
958 and down-regulated in experimental osteoarthritis. *J. Biol.* 286, 37758-37767.
- 959 Birk, D.E. (2001). Type V collagen: heterotypic type I/V collagen interactions in the regulation  
960 of fibril assembly. *Micron.* 32, 223-237.
- 961 Birk, D.E., and Brückner, P. (2011). Collagens, Suprastructures, and Collagen Fibril Assembly.  
962 In *The Extracellular Matrix: an Overview*, Mecham, R.P., ed. (Berlin, Heidelberg: Springer  
963 Berlin Heidelberg), pp. 77-115.
- 964 Calve, S., Odelberg, S.J., and Simon, H.G. (2010). A transitional extracellular matrix instructs  
965 cell behavior during muscle regeneration. *Dev. Biol.* 344, 259-71.

- 966 Capuano, A., Bucciotti, F., Farwell, K.D., Tippin Davis, B., Mroske, C., Hulick, P.J., Weissman,  
967 S.M., Gao, Q., Spessotto, P., Colombatti, A., et al. (2016). Diagnostic Exome Sequencing  
968 Identifies a Novel Gene, EMILIN1, Associated with Autosomal-Dominant Hereditary  
969 Connective Tissue Disease. *Hum. Mutat.* 37, 84-97.
- 970 Charvet, B., Ruggiero, F., and Le Guellec, D. (2012). The development of the myotendinous  
971 junction. A review. *Muscles Ligaments Tendons J* 2, 53-63.
- 972 Chaudhry, S.S., Gazzard, J., Baldock, C., Dixon, J., Rock, M.J., Skinner, G.C., Steel, K.P.,  
973 Kielty, C.M., and Dixon, M.J. (2001). Mutation of the gene encoding fibrillin-2 results in  
974 syndactyly in mice. *Hum. Mol. Genet.* 10, 835-843.
- 975 Chipman, S.D., Sweet, H.O., McBride, D.J., Davisson, M.T., Marks, S.C., Shuldiner, A.R.,  
976 Wenstrup, R.J., Rowe, D.W., and Shapiro, J.R. (1993). Defective pro alpha 2(I) collagen  
977 synthesis in a recessive mutation in mice: a model of human osteogenesis imperfecta. *Proc. Natl.*  
978 *Acad. Sci.* 90, 1701-1705.
- 979 Cox, J., and Mann, M. (2008). MaxQuant enables high peptide identification rates,  
980 individualized p.p.b.-range mass accuracies and proteome-wide protein quantification. *Nat.*  
981 *Biotechnol.* 26, 1367-72.
- 982 Dallas, S.L., Sivakumar, P., Jones, C.J., Chen, Q., Peters, D.M., Mosher, D.F., Humphries, M.J.,  
983 and Kielty, C.M. (2005). Fibronectin regulates latent transforming growth factor-beta (TGF beta)  
984 by controlling matrix assembly of latent TGF beta-binding protein-1. *J Biol. Chem.* 280, 18871-  
985 80.
- 986 Di Lullo, G.A., Sweeney, S.M., Korkko, J., Ala-Kokko, L., and San Antonio, J.D. (2002).  
987 Mapping the ligand-binding sites and disease-associated mutations on the most abundant protein  
988 in the human, type I collagen. *J Biol. Chem.* 277, 4223-31.
- 989 Dieterich, D.C., Link, A.J., Graumann, J., Tirrell, D.A., and Schuman, E.M. (2006). Selective  
990 identification of newly synthesized proteins in mammalian cells using bioorthogonal  
991 noncanonical amino acid tagging (BONCAT). *Proc. Natl. Acad. of Sci.* 103, 9482.
- 992 Embree, M.C., Kilts, T.M., Ono, M., Inkson, C.A., Syed-Picard, F., Karsdal, M.A., Oldberg, A.,  
993 Bi, Y., and Young, M.F. (2010). Biglycan and fibromodulin have essential roles in regulating  
994 chondrogenesis and extracellular matrix turnover in temporomandibular joint osteoarthritis. *Am.*  
995 *J. Pathol.* 176, 812-826.
- 996 Fava, M., Barallobre-Barreiro, J., Mayr, U., Lu, R., Didangelos, A., Baig, F., Lynch, M.,  
997 Catibog, N., Joshi, A., Barwari, T., et al. (2018). Role of ADAMTS-5 in Aortic Dilatation and  
998 Extracellular Matrix Remodeling. *Arterioscler. Thromb. Vasc. Biol.* 38, 1537-1548.

- 999 Felsenthal, N., and Zelzer, E. (2017). Mechanical regulation of musculoskeletal system  
1000 development. *Development* 144, 4271-4283.
- 1001 Fluck, M., Mund, S.I., Schittny, J.C., Klossner, S., Durieux, A.C., and Giraud, M.N. (2008).  
1002 Mechano-regulated tenascin-C orchestrates muscle repair. *Proc. Natl. Acad. Sci. U. S. A.* 105,  
1003 13662-7.
- 1004 Fox, M.A., Ho, M.S., Smyth, N., and Sanes, J.R. (2008). A synaptic nidogen: developmental  
1005 regulation and role of nidogen-2 at the neuromuscular junction. *Neural Dev.* 3, 24.
- 1006 George, E.L., Georges-Labouesse, E.N., Patel-King, R.S., Rayburn, H., and Hynes, R.O. (1993).  
1007 Defects in mesoderm, neural tube and vascular development in mouse embryos lacking  
1008 fibronectin. *Development* 119, 1079-1091.
- 1009 Hassell, J., Yamada, Y., and Arikawa-Hirasawa, E. (2002). Role of perlecan in skeletal  
1010 development and diseases. *Glycoconj. J* 19, 263-7.
- 1011 Hesse, L., Stordalen, G.A., Wenglén, C., Petzold, C., Tanner, E.K., Brorson, S.-H., Baekkevold,  
1012 E.S., Önnarfjord, P., Reinholt, F.P., and Heinegård, D. (2013). The Skeletal Phenotype of  
1013 Chondroadherin Deficient Mice. *PLOS ONE* 8, e63080.
- 1014 Hu, H., Wang, M., Wang, H., Liu, Z., Guan, X., Yang, R., Huang, R., Tang, Q., Zou, C., Wang,  
1015 G., et al. (2018). MEGF6 Promotes the Epithelial-to-Mesenchymal Transition via the  
1016 TGF $\beta$ /SMAD Signaling Pathway in Colorectal Cancer Metastasis. *Cell Physiol. Biochem.* 46,  
1017 1895-1906.
- 1018 Huang, A.H. (2017). Coordinated development of the limb musculoskeletal system: Tendon and  
1019 muscle patterning and integration with the skeleton. *Dev. Biol.* 429, 420-428.
- 1020 Hubert, T., Grimal, S., Carroll, P., and Fichard-Carroll, A. (2009). Collagens in the developing  
1021 and diseased nervous system. *Cell Mol. Life Sci.* 66, 1223-38.
- 1022 Imamura, Y., Scott, I.C., and Greenspan, D.S. (2000). The pro-alpha3(V) collagen chain.  
1023 Complete primary structure, expression domains in adult and developing tissues, and comparison  
1024 to the structures and expression domains of the other types V and XI procollagen chains. *J Biol.*  
1025 *Chem.* 275, 8749-59.
- 1026 Kadler, K.E., Hill, A., and Canty-Laird, E.G. (2008). Collagen fibrillogenesis: fibronectin,  
1027 integrins, and minor collagens as organizers and nucleators. *Curr. Opin. Cell Biol.* 20, 495-501.
- 1028 Karsenty, G., and Wagner, E.F. (2002). Reaching a Genetic and Molecular Understanding of  
1029 Skeletal Development. *Dev. Cell* 2, 389-406.

- 1030 Krug, D., Klinger, M., Haller, R., Hargus, G., Büning, J., Rohwedel, J., and Kramer, J. (2013).  
1031 Minor cartilage collagens type IX and XI are expressed during embryonic stem cell-derived in  
1032 vitro chondrogenesis. *Ann. Anat.* 195, 88-97.
- 1033 Kwan, K.M., Pang, M.K., Zhou, S., Cowan, S.K., Kong, R.Y., Pfordte, T., Olsen, B.R., Sillence,  
1034 D.O., Tam, P.P., and Cheah, K.S. (1997). Abnormal compartmentalization of cartilage matrix  
1035 components in mice lacking collagen X: implications for function. *J. Cell Biol.* 136, 459-471.
- 1036 Lee, N.J., Ali, N., Zhang, L., Qi, Y., Clarke, I., Enriquez, R.F., Brzozowska, M., Lee, I.C.,  
1037 Rogers, M.J., Laybutt, D.R., et al. (2018). Osteoglycin, a novel coordinator of bone and glucose  
1038 homeostasis. *Molec. Metab.* 13, 30-44.
- 1039 Li, A., Wei, Y., Hung, C., and Vunjak-Novakovic, G. (2018). Chondrogenic properties of  
1040 collagen type XI, a component of cartilage extracellular matrix. *Biomaterials* 173, 47-57.
- 1041 Liu, X., Wu, H., Byrne, M., Krane, S., and Jaenisch, R. (1997). Type III collagen is crucial for  
1042 collagen I fibrillogenesis and for normal cardiovascular development. *Proceedings of the Proc.*  
1043 *Natl. Acad. Sci. U.S.A.* 94, 1852-1856.
- 1044 Lu, P., Takai, K., Weaver, V.M., and Werb, Z. (2011). Extracellular matrix degradation and  
1045 remodeling in development and disease. *CSH Perspect. Biol.* 3, a005058.
- 1046 Mackie, E.J., and Tucker, R.P. (1999). The tenascin-C knockout revisited. *J. Cell Sci.* 112 ( Pt  
1047 22), 3847-53.
- 1048 Martin, P. (1990). Tissue patterning in the developing mouse limb. *Int. J. Dev. Biol.* 34, 323-36.
- 1049 Martinez, J.R., Dhawan, A., and Farach-Carson, M.C. (2018). Modular Proteoglycan  
1050 Perlecan/HSPG2: Mutations, Phenotypes, and Functions. *Genes (Basel)* 9.
- 1051 Miner, J.H., Cunningham, J., and Sanes, J.R. (1998). Roles for laminin in embryogenesis:  
1052 exencephaly, syndactyly, and placentopathy in mice lacking the laminin alpha5 chain. *J. Cell*  
1053 *Biol.* 143, 1713-1723.
- 1054 Morello, R. (2018). Osteogenesis imperfecta and therapeutics. *Matrix Biol.* 71-72, 294-312.
- 1055 Naba, A., Clauser, K.R., Hoersch, S., Liu, H., Carr, S.A., and Hynes, R.O. (2012). The  
1056 Matrisome: In Silico Definition and In Vivo Characterization by Proteomics of Normal and Tumor  
1057 Extracellular Matrices. *Mol. Cell. Proteomics* 11, M111.014647.
- 1058 Naba, A., Clauser, K.R., and Hynes, R.O. (2015). Enrichment of Extracellular Matrix Proteins  
1059 from Tissues and Digestion into Peptides for Mass Spectrometry Analysis. *J. Vis. Exp.* e53057.

- 1060 Naba, A., Clauser, K.R., Mani, D.R., Carr, S.A., and Hynes, R.O. (2017a). Quantitative  
1061 proteomic profiling of the extracellular matrix of pancreatic islets during the angiogenic switch  
1062 and insulinoma progression. *Sci. Rep.* 7, 40495-40495.
- 1063 Naba, A., Pearce, O.M.T., Del Rosario, A., Ma, D., Ding, H., Rajeeve, V., Cutillas, P.R.,  
1064 Balkwill, F.R., and Hynes, R.O. (2017b). Characterization of the Extracellular Matrix of Normal  
1065 and Diseased Tissues Using Proteomics. *J. Proteome Res.* 16, 3083-3091.
- 1066 Neame, P.J., Kay, C.J., McQuillan, D.J., Beales, M.P., and Hassell, J.R. (2000). Independent  
1067 modulation of collagen fibrillogenesis by decorin and lumican. *Cell. Mol. Life Sci.* 57, 859-863.
- 1068 Nicolae, C., Ko, Y.-P., Miosge, N., Niehoff, A., Studer, D., Enggist, L., Hunziker, E.B.,  
1069 Paulsson, M., Wagener, R., and Aszodi, A. (2007). Abnormal Collagen Fibrils in Cartilage of  
1070 Matrilin-1/Matrilin-3-deficient Mice. *J. Biol.* 282, 22163-22175.
- 1071 Ocken, A.R., Ku, M.M., Kinzer-Ursem, T.L., and Calve, S. (2020). Perlecan knockdown  
1072 significantly alters extracellular matrix composition and organization during cartilage  
1073 development. *Mol. Cell. Proteomics*, mcp.RA120.001998.
- 1074 Parry, D.A., Barnes, G.R., and Craig, A.S. (1978). A comparison of the size distribution of  
1075 collagen fibrils in connective tissues as a function of age and a possible relation between fibril  
1076 size distribution and mechanical properties. *Proc. R. Soc. Lond. B. Biol. Sci.* 203, 305-21.
- 1077 Qi, Y., and Xu, R. (2018). Roles of PLODs in Collagen Synthesis and Cancer Progression. *Front.*  
1078 *Cell Dev. Biol.* 6.
- 1079 Raudvere, U., Kolberg, L., Kuzmin, I., Arak, T., Adler, P., Peterson, H., and Vilo, J. (2019).  
1080 g:Profiler: a web server for functional enrichment analysis and conversions of gene lists (2019  
1081 update). *Nucleic Acids Res.* 47, W191-W198.
- 1082 Rozario, T., and Desimone, D.W. (2010). The extracellular matrix in development and  
1083 morphogenesis: A dynamic view. *Dev. Biol.* 341, 126-140.
- 1084 Sabatelli, P., Gualandi, F., Gara, S.K., Grumati, P., Zamparelli, A., Martoni, E., Pellegrini, C.,  
1085 Merlini, L., Ferlini, A., Bonaldo, P., et al. (2012). Expression of collagen VI  $\alpha 5$  and  $\alpha 6$  chains in  
1086 human muscle and in Duchenne muscular dystrophy-related muscle fibrosis. *Matrix Biol.* 31,  
1087 187-96.
- 1088 Saleh, A.M., Jacobson, K.R., Kinzer-Ursem, T.L., and Calve, S. (2019a). Dynamics of Non-  
1089 Canonical Amino Acid-Labeled Intra- and Extracellular Proteins in the Developing Mouse. *Cell.*  
1090 *Mol. Bioeng.*

- 1091 Saleh, A.M., Wilding, K.M., Calve, S., Bundy, B.C., and Kinzer-Ursem, T.L. (2019b). Non-  
1092 canonical amino acid labeling in proteomics and biotechnology. *J. Biol. Eng.* 13, 43.
- 1093 Schiavinato, A., Keene, D.R., Imhof, T., Doliana, R., Sasaki, T., and Sengle, G. (2017). Fibulin-  
1094 4 deposition requires EMILIN-1 in the extracellular matrix of osteoblasts. *Sci. Rep.* 7.
- 1095 Schindelin, J., Arganda-Carreras, I., Frise, E., Kaynig, V., Longair, M., Pietzsch, T., Preibisch,  
1096 S., Rueden, C., Saalfeld, S., Schmid, B., et al. (2012). Fiji: an open-source platform for  
1097 biological-image analysis. *Nat. Methods* 9, 676-682.
- 1098 Schröder, C.U., Heinz, A., Majovsky, P., Karaman Mayack, B., Brinckmann, J., Sippl, W., and  
1099 Schmelzer, C.E.H. (2018). Elastin is heterogeneously cross-linked. *J. Biol.* 293, 15107-15119.
- 1100 Scialdone, A., Tanaka, Y., Jawaid, W., Moignard, V., Wilson, N.K., Macaulay, I.C., Marioni,  
1101 J.C., and Göttgens, B. (2016). Resolving early mesoderm diversification through single-cell  
1102 expression profiling. *Nature* 535, 289-293.
- 1103 Sottile, J., and Hocking, D.C. (2002). Fibronectin polymerization regulates the composition and  
1104 stability of extracellular matrix fibrils and cell-matrix adhesions. *Mol. Biol. Cell* 13, 3546-59.
- 1105 Steiglitiz, B.M., Kreider, J.M., Frankenburg, E.P., Pappano, W.N., Hoffman, G.G., Meganck,  
1106 J.A., Liang, X., Höök, M., Birk, D.E., Goldstein, S.A., et al. (2006). Procollagen C proteinase  
1107 enhancer 1 genes are important determinants of the mechanical properties and geometry of bone  
1108 and the ultrastructure of connective tissues. *Mol. Cell. Biol.* 26, 238-249.
- 1109 Stum, M., Girard, E., Bangratz, M., Bernard, V., Herbin, M., Vignaud, A., Ferry, A., Davoine,  
1110 C.S., Echaniz-Laguna, A., Rene, F., et al. (2008). Evidence of a dosage effect and a  
1111 physiological endplate acetylcholinesterase deficiency in the first mouse models mimicking  
1112 Schwartz-Jampel syndrome neuromyotonia. *Hum. Mol. Genet.* 17, 3166-79.
- 1113 Suna, G., Wojakowski, W., Lynch, M., Barallobre-Barreiro, J., Yin, X., Mayr, U., Baig, F., Lu,  
1114 R., Fava, M., Hayward, R., et al. (2018). Extracellular Matrix Proteomics Reveals Interplay of  
1115 Aggrecan and Aggrecanases in Vascular Remodeling of Stented Coronary Arteries. *Circulation*  
1116 137, 166-183.
- 1117 Symoens, S., Syx, D., Malfait, F., Callewaert, B., De Backer, J., Vanakker, O., Coucke, P., and  
1118 De Paepe, A. (2012). Comprehensive molecular analysis demonstrates type V collagen mutations  
1119 in over 90% of patients with classic EDS and allows to refine diagnostic criteria. *Hum. Mutat.*  
1120 33, 1485-93.
- 1121 Taha, I.N., and Naba, A. (2019). Exploring the extracellular matrix in health and disease using  
1122 proteomics. *Essays Biochem* 63, 417-432.



- 1123 Tanzer, M.L. (1973). Cross-linking of collagen. *Science* 180, 561-6.
- 1124 Taylor, S.H., Al-Youha, S., Van Agtmael, T., Lu, Y., Wong, J., McGrouther, D.A., and Kadler,  
1125 K.E. (2011). Tendon is covered by a basement membrane epithelium that is required for cell  
1126 retention and the prevention of adhesion formation. *PLOS ONE* 6, e16337.
- 1127 Tyanova, S., Temu, T., Sinitcyn, P., Carlson, A., Hein, M.Y., Geiger, T., Mann, M., and Cox, J.  
1128 (2016). The Perseus computational platform for comprehensive analysis of (prote)omics data.  
1129 *Nat. Methods* 13, 731-740.
- 1130 Vallet, S.D., and Ricard-Blum, S. (2019). Lysyl oxidases: from enzyme activity to extracellular  
1131 matrix cross-links. *Essays Biochem.* 63, 349-364.
- 1132 Weis, S.M., Emery, J.L., Becker, K.D., McBride, D.J., Omens, J.H., and McCulloch, A.D.  
1133 (2000). Myocardial Mechanics and Collagen Structure in the Osteogenesis Imperfecta Murine (  
1134 oim ). *Circ. Res.* 87, 663-669.
- 1135 Wenstrup, R.J., Florer, J.B., Brunskill, E.W., Bell, S.M., Chervoneva, I., and Birk, D.E. (2004).  
1136 Type V Collagen Controls the Initiation of Collagen Fibril Assembly. *J. Biol.* 279, 53331-53337.
- 1137 Widmer, C., Gebauer, J.M., Brunstein, E., Rosenbaum, S., Zaucke, F., Drögemüller, C., Leeb,  
1138 T., and Baumann, U. (2012). Molecular basis for the action of the collagen-specific chaperone  
1139 Hsp47/SERPINH1 and its structure-specific client recognition. *Proc. Natl. Acad. Sci.* 109,  
1140 13243.
- 1141 Xu, J., Lamouille, S., and Derynck, R. (2009). TGF- $\beta$ -induced epithelial to mesenchymal  
1142 transition. *Cell Res.* 19, 156-172.
- 1143 Yang, X., Hu, B., Liao, J., Qiao, Y., Chen, Y., Qian, Y., Feng, S., Yu, F., Dong, J., Hou, Y., et al.  
1144 (2019). Distinct enhancer signatures in the mouse gastrula delineate progressive cell fate  
1145 continuum during embryo development. *Cell Res.* 29, 911-926.
- 1146 Zheng, H., and Xie, W. (2019). The role of 3D genome organization in development and cell  
1147 differentiation. *Nat. Rev. Mol. Cell Biol.* 20, 535-550.
- 1148 Zou, Y., Zwolanek, D., Izu, Y., Gandhi, S., Schreiber, G., Brockmann, K., Devoto, M., Tian, Z.,  
1149 Hu, Y., Veit, G., et al. (2014). Recessive and dominant mutations in COL12A1 cause a novel  
1150 EDS/myopathy overlap syndrome in humans and mice. *Hum. Molec. Genet* 23, 2339-2352.  
1151  
1152

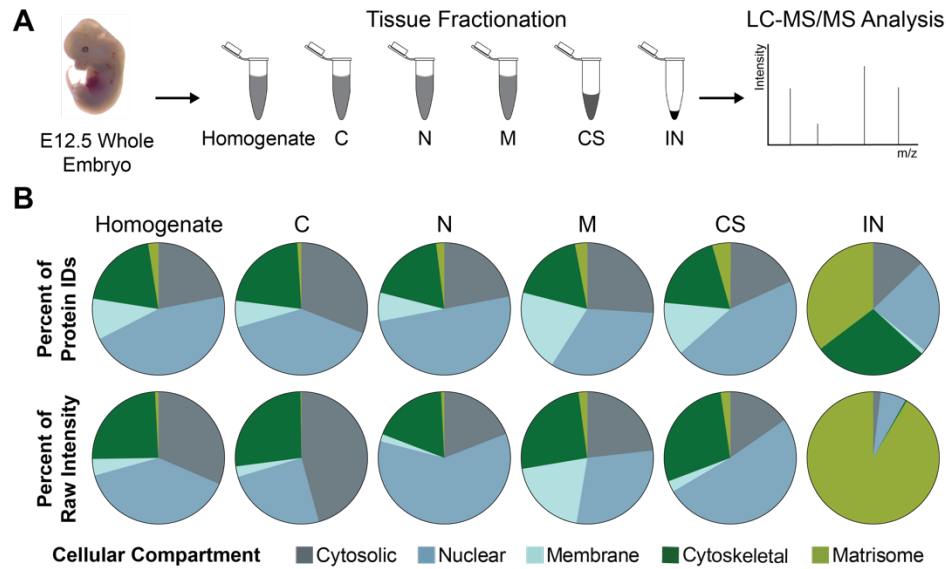

1153

1154

1155 **Figure S1.** Proteomic analysis of fractionated E12.5 whole murine embryos. **(A)** Experimental workflow

1156 combining tissue fractionation with LC-MS/MS to investigate the matrisome coverage in each fraction. **(B)**

1157 The distribution of protein IDs and raw protein intensities, categorized by cellular compartment as defined

1158 by (Saleh, et al., 2019a), in homogenate, cytosolic (C), nuclear (N), membrane (M), cytoskeletal (CS) and

1159 insoluble (IN) fractions. There was minimal matrisome identification prior to tissue fractionation (average,

1160  $n=2$  biological replicates).

1161

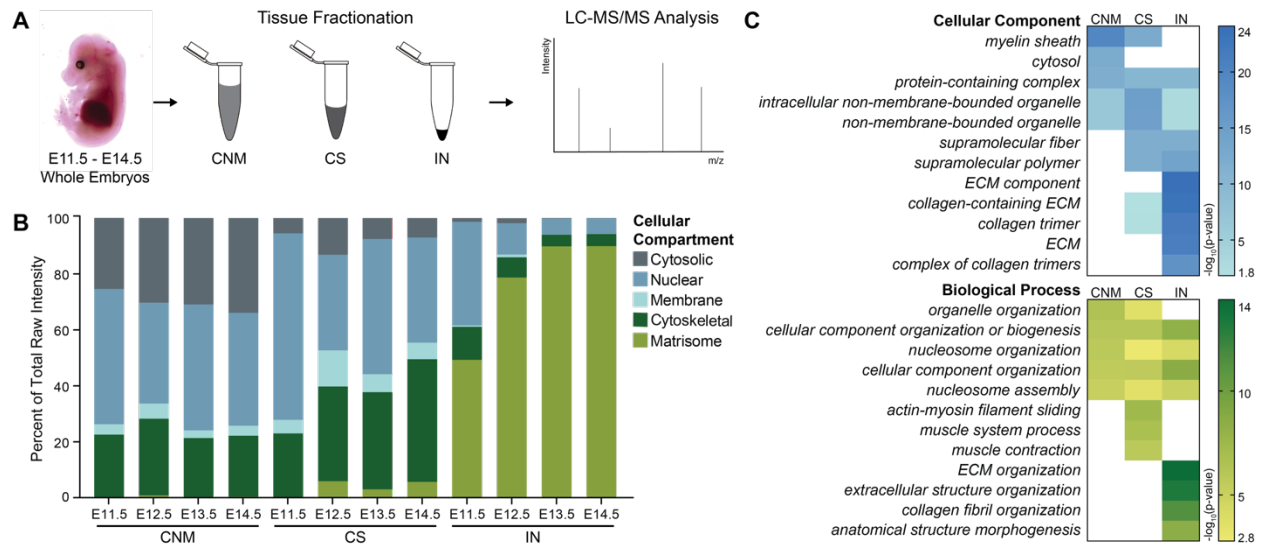

1162

1163

1164 **Figure 1.** Proteomic analysis of whole murine embryos. **(A)** Tissue fractionation was combined with LC-  
 1165 MS/MS to analyze E11.5-E14.5 whole embryos ( $n=3$  biological replicates/timepoint). Cytosolic (C),  
 1166 nuclear (N) and membrane (M) fractions were combined into one CNM fraction. CNM, CS and IN fractions  
 1167 were analyzed by LC-MS/MS and raw intensities were determined using MaxQuant. **(B)** The distribution  
 1168 of cellular compartments, as defined by (Saleh, et al., 2019a), in CNM, CS and IN fractions plotted as  
 1169 average across biological replicates. Two-way ANOVA revealed the percentage of total raw intensities  
 1170 attributed to the matrisome was significantly different between timepoints ( $p<0.0001$ ) and fractions  
 1171 ( $p<0.0001$ ). **(C)** The top 5 significant GO "Cellular Component" and "Biological Process" terms generated  
 1172 from the 50 most abundant proteins within each CNM, CS and IN fraction of E14.5 embryos indicated  
 1173 successful enrichment of ECM-related GO terms in the IN fraction (see also **Figure S2**).

1174

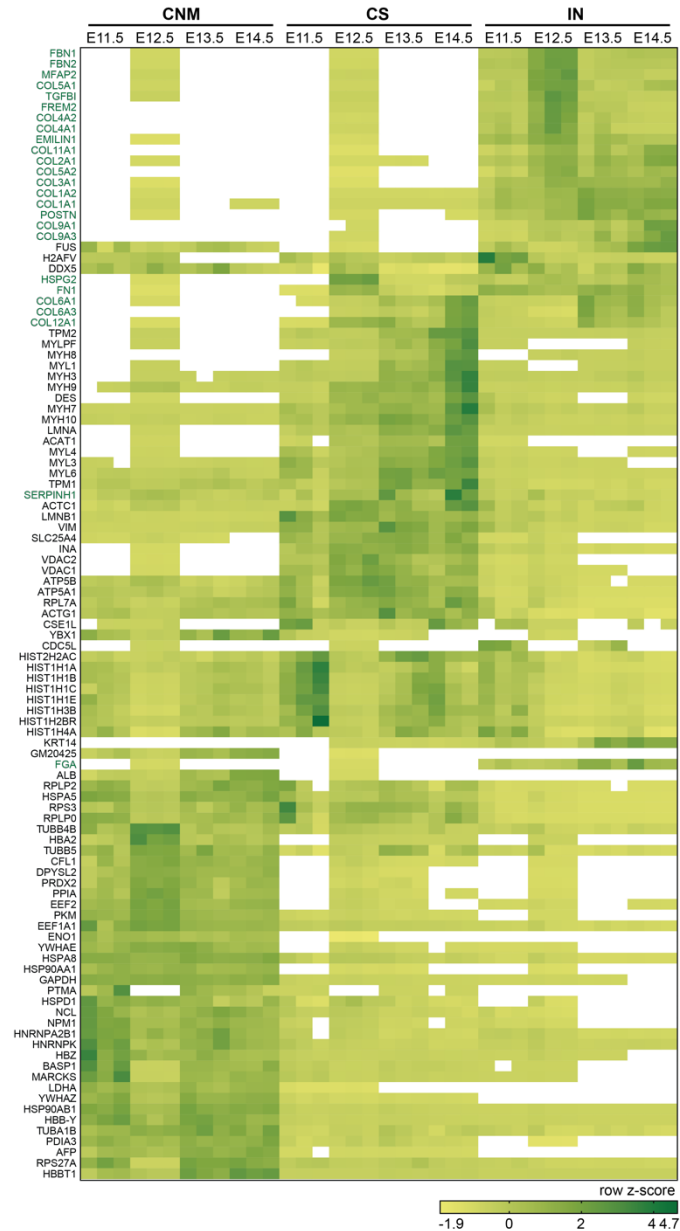

1175

1176 **Figure S2.** Unbiased hierarchal clustering of proteins identified in fractionated murine embryos. The 50  
1177 most abundant proteins in the cytosolic/nuclear/membrane (CNM), cytoskeletal (CS) and insoluble (IN)  
1178 fractions of E14.5 embryos are shown. The row z-score was calculated across all timepoints and fractions  
1179 for each protein. Unbiased clustering analysis, based on Pearson Correlation coefficients, showed that the  
1180 majority of matrisome proteins (green text) were identified in the IN fraction. White boxes signify zero  
1181 intensity values. Each column represents a biological replicate, with  $n=3$  replicates per timepoint.

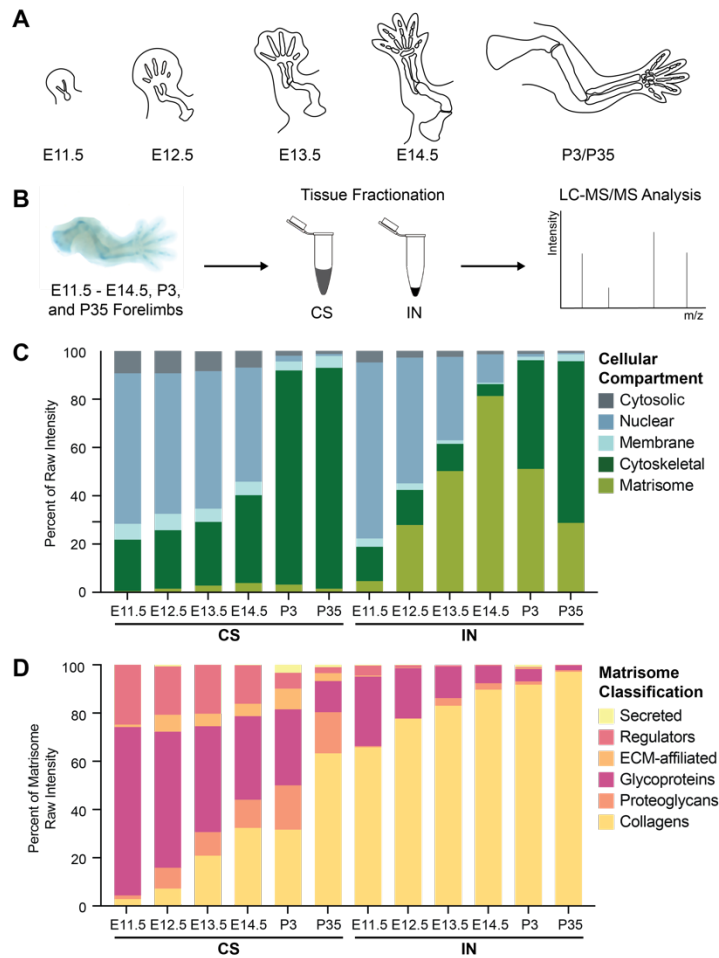

1182

1183

1184 **Figure 2.** Proteomic analysis of developing murine forelimbs. **(A)** Architecture of forelimbs dissected from

1185 embryos and pups (not drawn to scale). **(B)** Tissue fractionation was combined with LC-MS/MS analysis

1186 to investigate matrisome content of CS and IN of E11.5-P35 forelimbs ( $n=3$  biological replicates). **(C)** The

1187 distribution of cellular compartments, plotted as an average percentage of raw intensity, identified in CS

1188 and IN fractions. Two-way ANOVA showed the percentage of matrisome was dependent on timepoint

1189 ( $p<0.0001$ ) and fraction ( $p<0.0001$ ). **(D)** ECM proteins were categorized as defined by (Naba, et al., 2012),

1190 and percentages of raw matrisome intensity were plotted as a function of development. Three-way ANOVA

1191 revealed the distribution of matrisome components was significantly influenced by timepoint and fraction

1192 ( $p<0.0001$ ).

1193

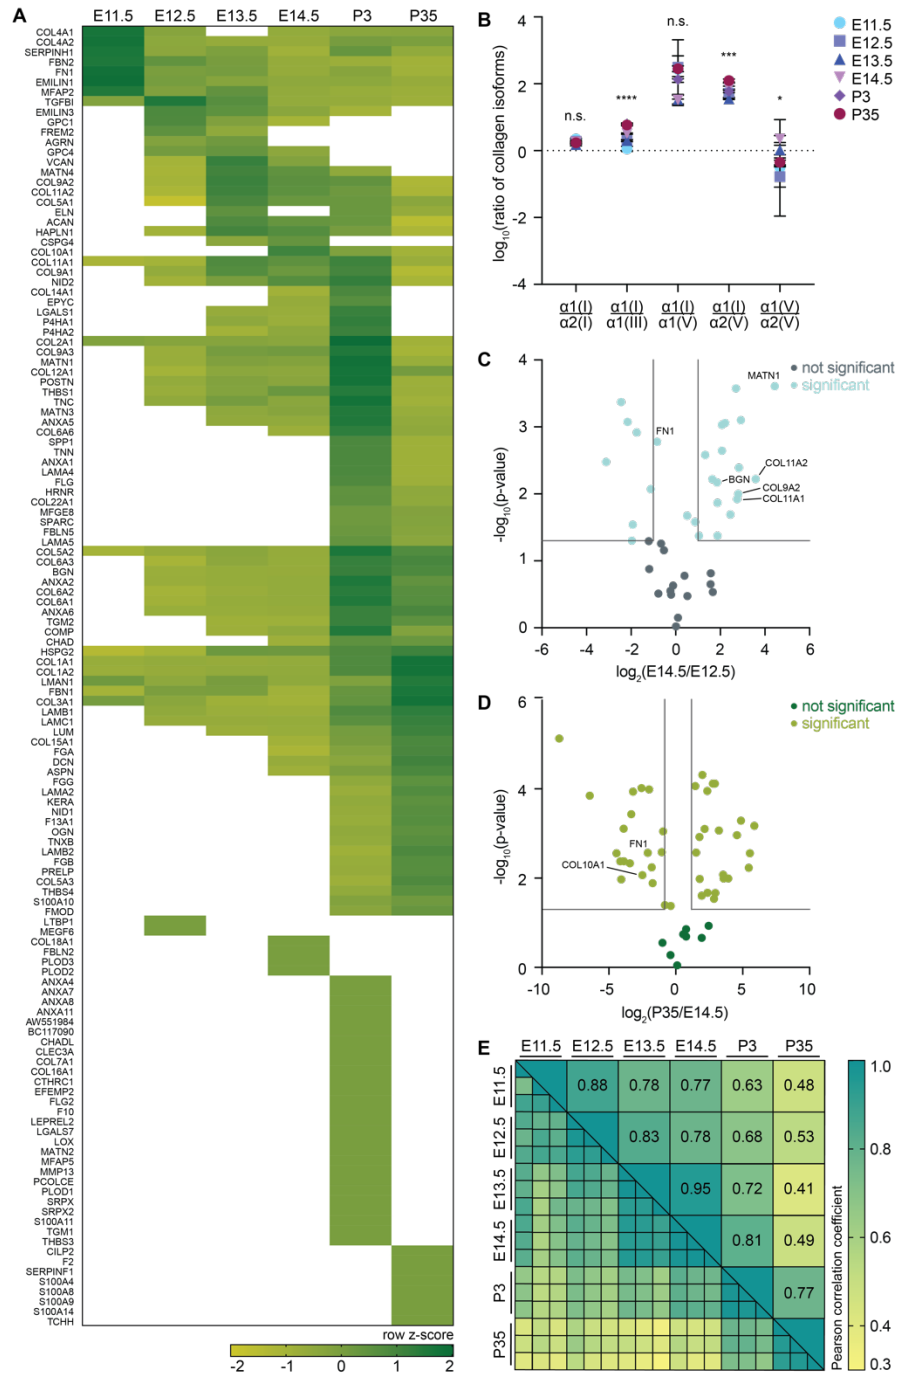

1194

1195 **Figure 3.** ECM protein composition varies as a function of murine musculoskeletal development. E11.5-

1196 P35 WT forelimbs were analyzed using LC-MS/MS as described in **Figure 2.** (A) LFQ intensities were

1197 normalized and combined from both CS and IN fractions for each timepoint (see **Methods**) and averaged

1198 across biological replicates ( $n=3$ ). Proteins were clustered, based on row z-score, to show dynamics as a

1199 function of development. Proteins identified in  $n \geq 2$  biological replicates were included in the heat map

1200 analysis. White boxes signify zero intensity values. **(B)** The ratios of the raw intensities of collagen chains  
1201 involved in type I collagen fibrillogenesis significantly varied between timepoints. Statistical differences  
1202 were determined for each ratio by one-way ANOVA across timepoints (n.s. denotes  $p>0.05$ ;  $*p<0.05$ ;  
1203  $***p<0.001$ ;  $****p<0.0001$ ) (**Table S3**). **(C, D)** Volcano plots comparing normalized LFQ intensity values  
1204 of ECM proteins identified at E12.5 and E14.5 or E14.5 and P35. Grey lines denote  $\geq 2$ -fold change and  
1205  $p<0.05$  (two-tailed t-test). **(E)** Pearson correlation coefficients comparing the matrisome between  
1206 timepoints.  
1207

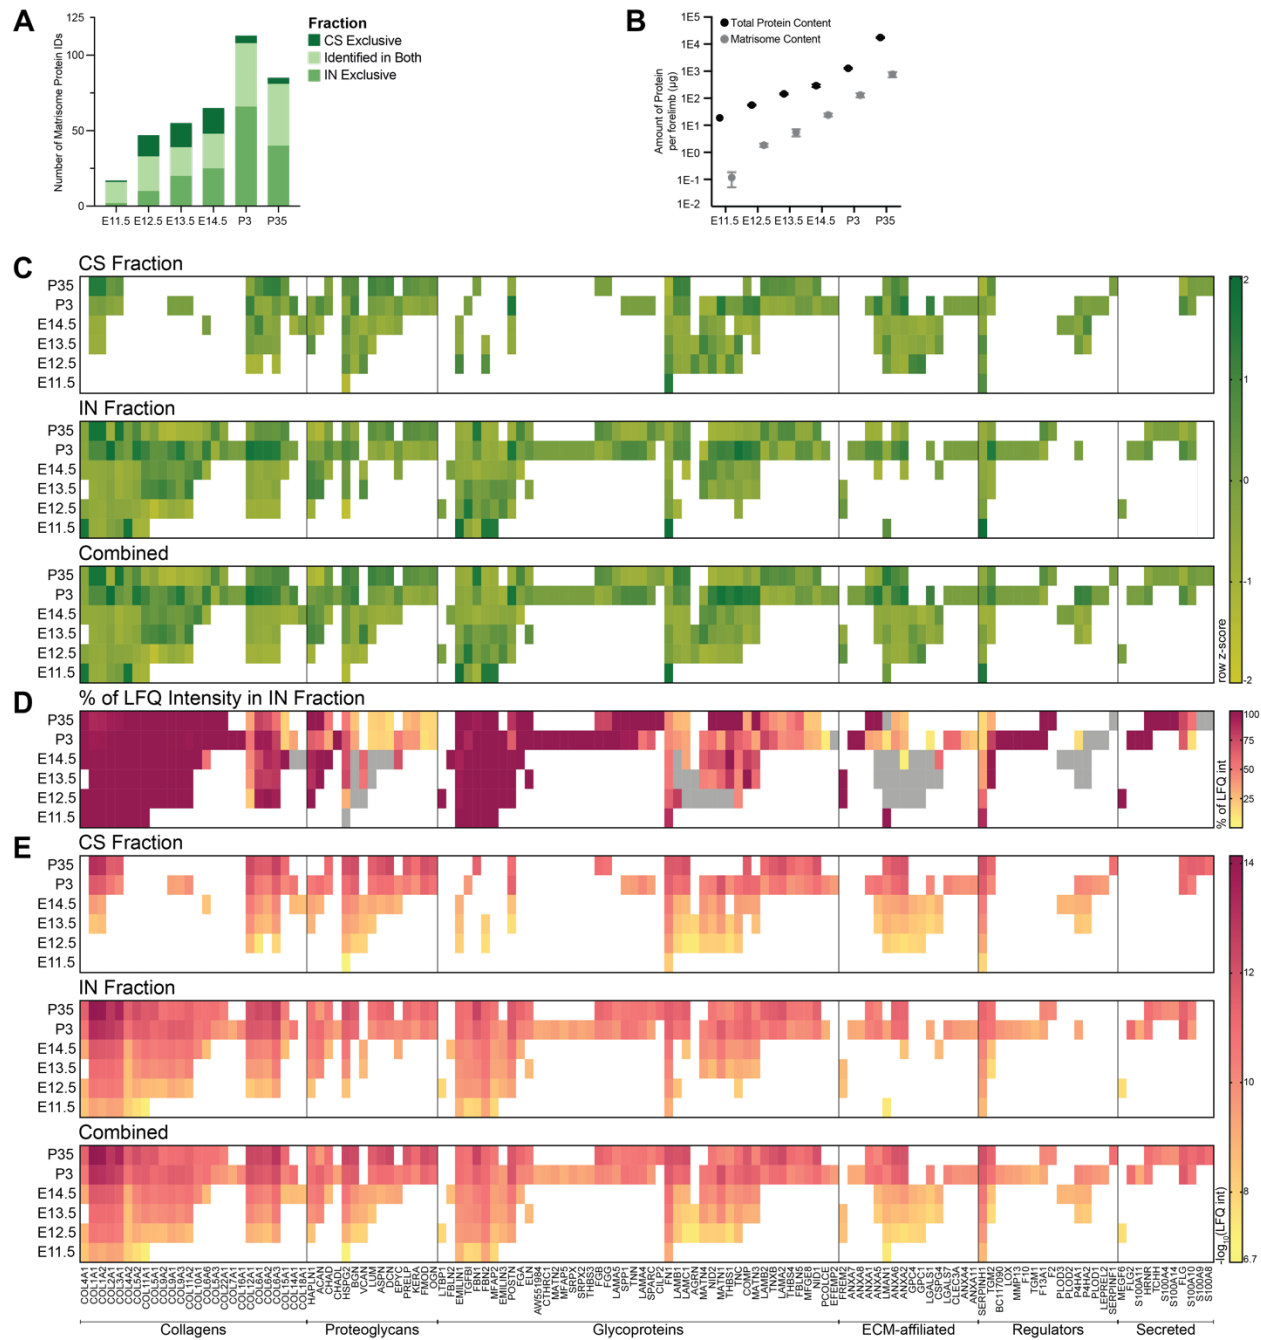

1208

1209 **Figure S3.** Comparative analysis of matrisome dynamics between fraction specific and combined LC-  
 1210 MS/MS LQF intensities. **(A)** The number of ECM proteins identified exclusively in CS or IN fractions or  
 1211 distributed across both. **(B)** The average amount of total protein (black) and matrisome (grey) in one  
 1212 forelimb. Two-way ANOVA revealed the amount of total protein and matrisome content significantly  
 1213 increased as a function of development ( $p < 0.0001$ ). **(C)** Row z-scores were calculated for the normalized



1214 LFQ intensities in the CS (top) and IN (middle) fractions, separately, and clustered based on matrisome  
1215 classification. By combining CS and IN intensities (bottom), the number of ECM protein identifications  
1216 increased, but overall matrisome dynamics did not change. **(D)** The percentage of combined LFQ intensity  
1217 **(C, bottom)** from the IN fraction **(C, middle)** indicates that there are differences in the amount of each ECM  
1218 protein extracted in the CS fraction. Percentages were plotted as the average across biological replicates.  
1219 Grey boxes denote protein intensities identified exclusively in the CS fraction **(C, top)**. **(E)** LFQ intensities  
1220 of ECM proteins quantified in CS and IN fractions were normalized individually (top and middle), then  
1221 combined (bottom; see **Methods**). For heat map analysis, intensities were  $\log_{10}$ -transformed and plotted as  
1222 the average of  $n=3$  biological replicates. White boxes denote that protein was not identified at that  
1223 timepoint.  
1224

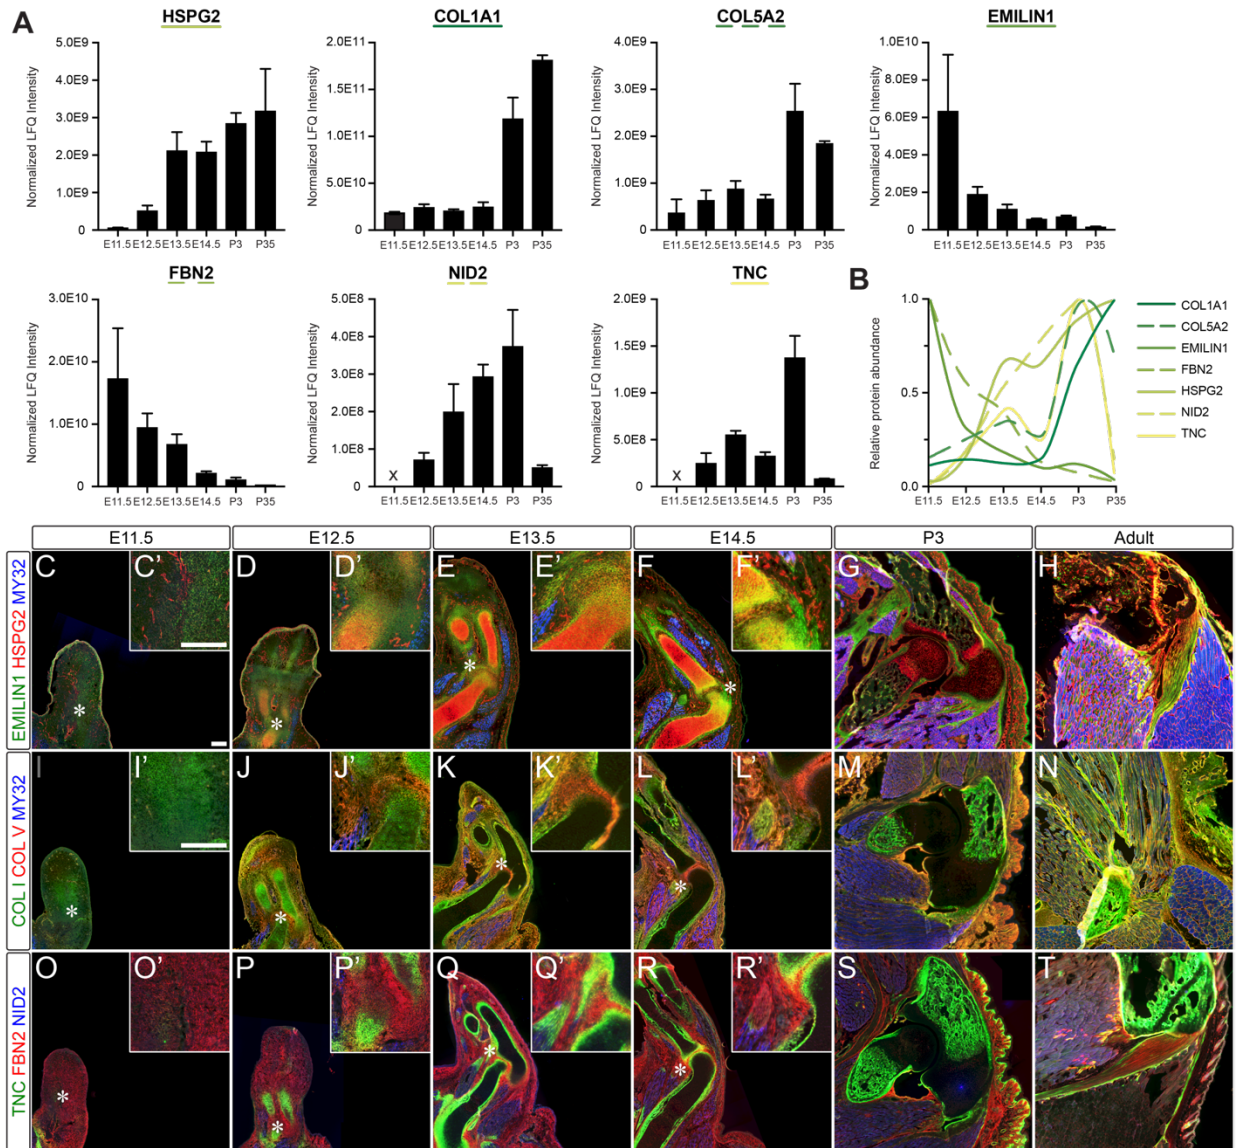

1225

1226

1227 **Figure 4.** The ECM is differentially distributed within musculoskeletal tissues during forelimb

1228 development. **(A)** Normalized combined LFO intensities from WT E11.5-P35 forelimbs for proteins

1229 selected for immunohistochemistry plotted as average ( $n=3$  biological replicates). Intensity values and one-

1230 way ANOVA statistics for each protein are reported in **Tables S3**. **(B)** Graphical summary of protein

1231 dynamics displayed in **(A)**. The largest value for each protein was set to 1 and the remaining were scaled

1232 to show relative abundance as a function of timepoint. **(C-T)** Cryosections from E11.5-E14.5, P3 and adult

1233 forelimbs were stained with antibodies against: **(C-H, C'-F')** EMILIN1 (green), HSPG2 (red), and myosin

1234 heavy chain, a marker for differentiated skeletal muscle (MY32; blue); (**I-N, I'-L'**) type I collagen (COL  
1235 I; green), type V collagen (COL V; red), and MY32 (blue); (**O-T, O'-R'**) TNC (green), FBN2 (red), and  
1236 NID2 (blue). Insets (indicated with ') are a 3× enlargement of the region containing the nascent elbow (\*)  
1237 for E11.5-E14.5. Scale bars=200 μm. Individual channels and secondary antibody only negative control  
1238 panels are shown in **Figures S4-S6**.  
1239

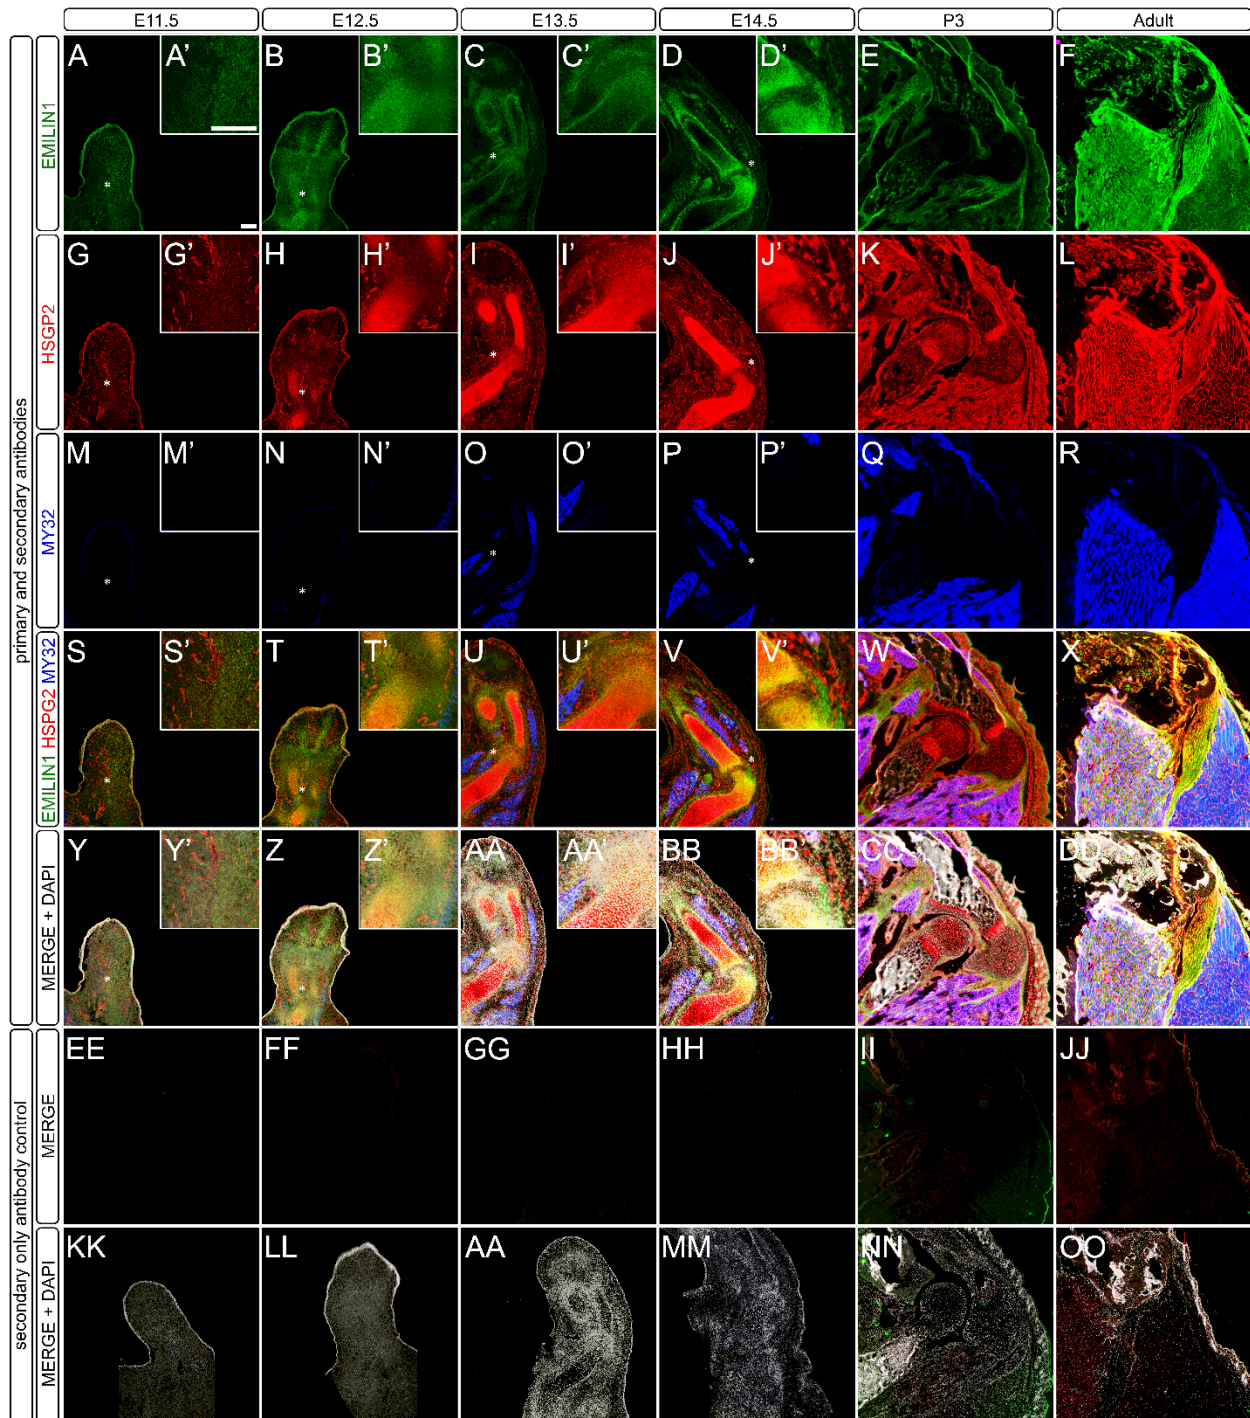

1240

1241 **Figure S4.** Spatiotemporal distribution of elastin microfibril interfacier 1 (EMILIN1) and perlecan (HSPG2)

1242 during forelimb development show differential patterning of proteins. (A-DD) Cryosections from E11.5-

1243 E14.5, P3 and adult were stained with antibodies against: **(A-F, A'-D')** EMILIN1 (green); **(G-L, G'-J')**  
1244 perlecan (HSPG2; red); **(M-R, M'-P')** myosin heavy chain, a marker for differentiated skeletal muscle  
1245 (MY32; blue); **(S-X, S'-V')** merge (green, red and blue); and **(Y-AD, Y'-AB')** merge with DAPI (grey).  
1246 **(EE-OO)** Secondary antibody only negative controls: **(EE-JJ)** merge; and **(KK-OO)** merge with DAPI.  
1247 Insets (indicated with ') are a 3× enlargement of the forelimb containing the nascent elbow for E11.5-E14.5  
1248 at the location indicated with \*. Scale bars = 200 μm.  
1249

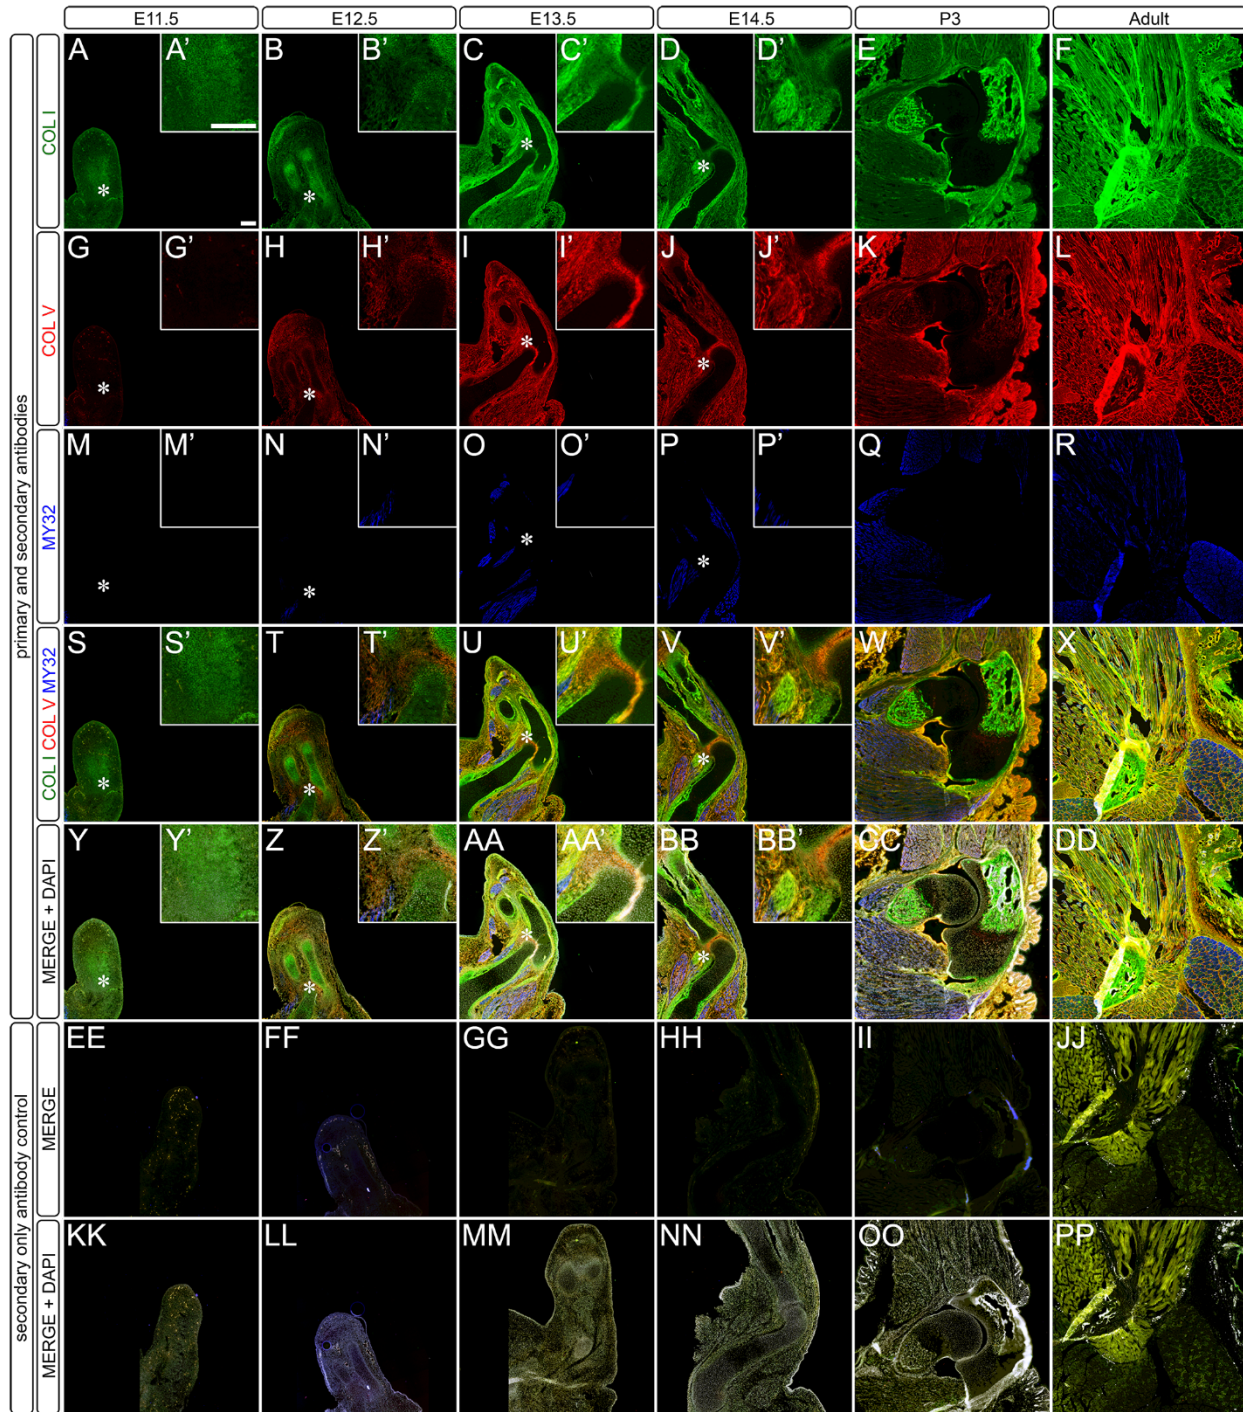

1250

1251

1252 **Figure S5.** Spatiotemporal distribution of collagens, type I and V, during forelimb development show

1253 differential patterning of proteins. (A-BB) Cryosections from E11.5 – E14.5, P3 and adult were stained

1254 with antibodies against: (A-F, A'-D') type I collagen (COL I; green); (G-L, G'-J') type V collagen (COL

1255 V; red); **(M-R, M'-P')** myosin heavy chain, a marker for differentiated skeletal muscle (MY32; blue); **(S-**  
1256 **X, S'-V')** merge (green, red, blue); and **(Y-DD, Y'-BB')** merge with DAPI (grey). **(EE-OO)** Secondary  
1257 antibody only negative controls: **(EE-JJ)** merge; and **(KK-OO)** merge with DAPI. Insets (indicated with  
1258 ') are a 3× enlargement of the region containing the nascent elbow (\*) for E11.5-E14.5. Scale bars=200  
1259 μm.  
1260

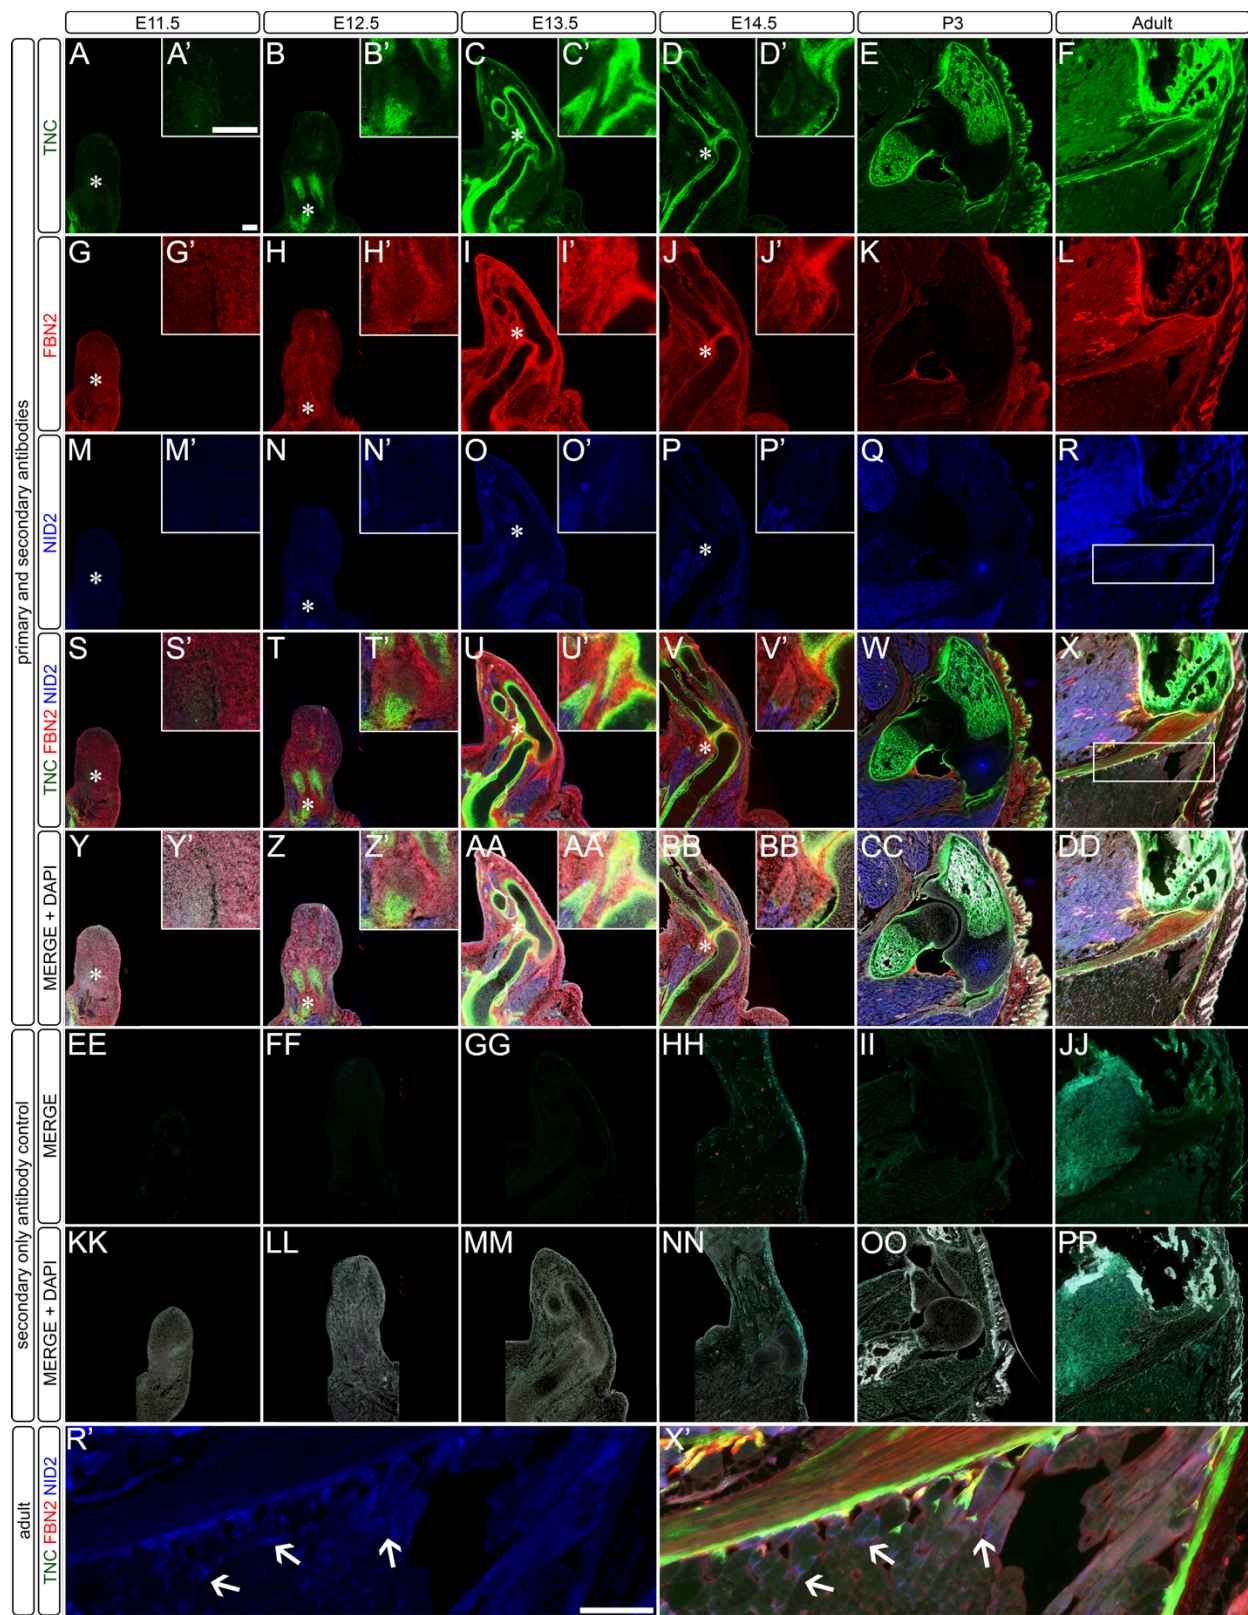

1261



1262 **Figure S6.** Spatiotemporal distribution of tenascin-C, fibrillin-2 and nidogen-2 during forelimb  
1263 development show differential patterning of proteins. **(A-BB)** Cryosections from E11.5 – E14.5, P3 and  
1264 adult were stained with antibodies against: **(A-F, A'-D')** tenascin-C (TNC; green); **(G-L, G'-J')** fibrillin-2  
1265 (FBN2; red); **(M-R, M'-P')** nidogen-2 (NID2; blue); **(S-X, S'-V')** merge (green, red, blue); and **(Y-DD,**  
1266 **Y'-BB')** merge with DAPI (grey). **(EE-OO)** Secondary antibody only negative controls: **(EE-JJ)** merge;  
1267 and **(KK-OO)** merge with DAPI. Insets (indicated with ') **(R')** NID2 and **(X')** TNC/FBN2/NID2 merge  
1268 channels showed punctate staining (arrow) of NID2 in the adult. White box in **(R)** and **(X)** highlighted the  
1269 inset location. Other insets are a 3× enlargement of the region containing the nascent elbow (\*) for E11.5–  
1270 E14.5. Scale bars=200 μm.  
1271

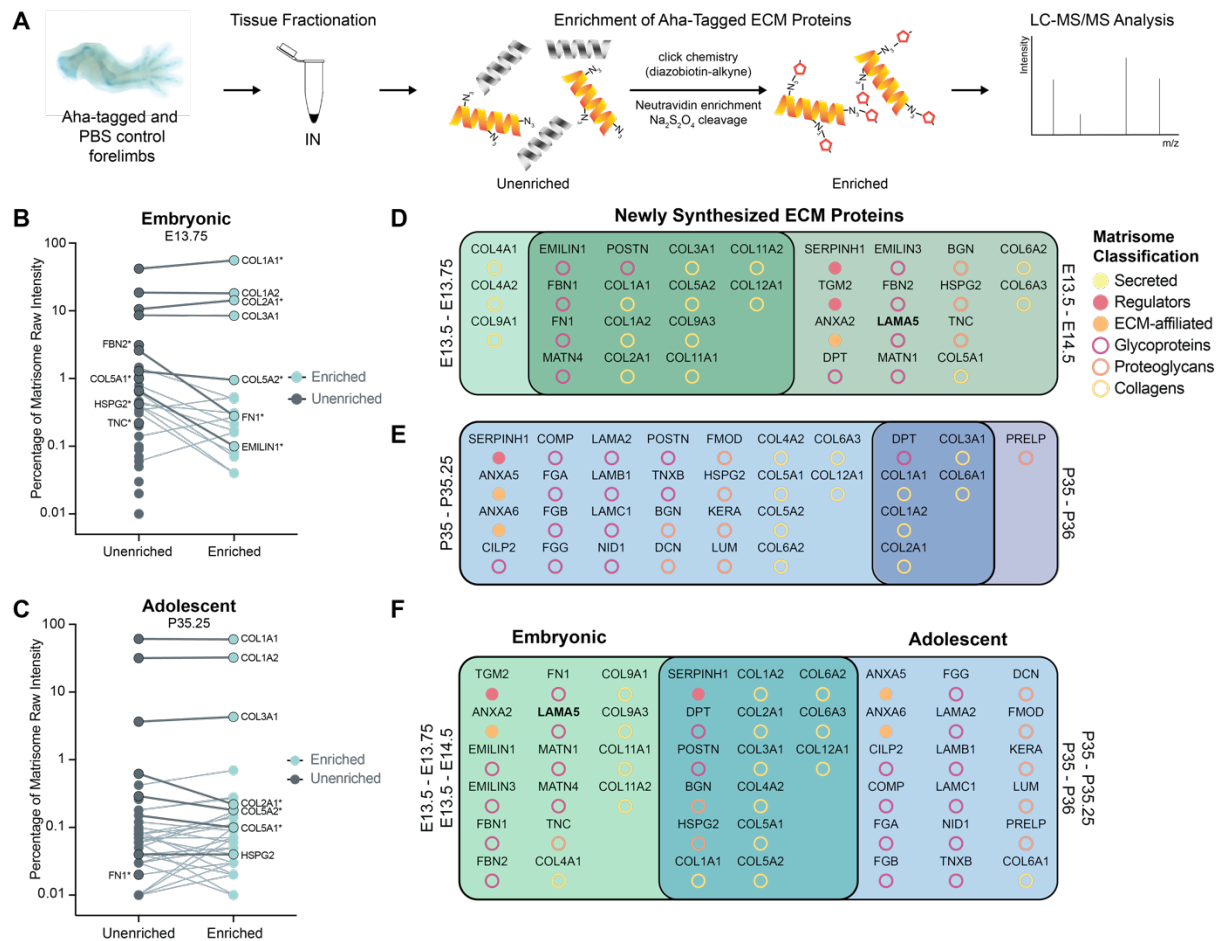

1272

1273

1274 **Figure 5.** Newly synthesized ECM proteins vary during morphogenesis and growth. **(A)** *In vivo* Aha-  
 1275 tagging, tissue fractionation and enrichment of Aha-labeled ECM proteins were combined with LC-MS/MS  
 1276 analysis. **(B, C)** Relative percentage of matrisome intensity between unenriched (left) and enriched (right)  
 1277 samples. Data points are the average of  $n=3$  biological replicates. Labels on the left indicate ECM proteins  
 1278 of interest that were only identified in unenriched samples. Lines connect proteins identified in both  
 1279 unenriched and enriched samples (labeled on the right). Darker, bolded lines highlight ECM proteins of  
 1280 interest and \* indicates a significant change ( $p<0.05$ ) in intensity percentage between unenriched and  
 1281 enriched samples. **(D)** Comparison of identified newly synthesized ECM proteins, both unique and shared,  
 1282 between E13.5-E13.75 and E13.5-E14.5 timepoints. **(E)** Comparison of identified newly synthesized ECM

1283 proteins, both unique and shared, between P35-P35.25 and P35-P36 timepoints. (F) Newly synthesized  
1284 ECM proteins, both unique and shared, identified in embryonic and adolescent forelimbs.  
1285

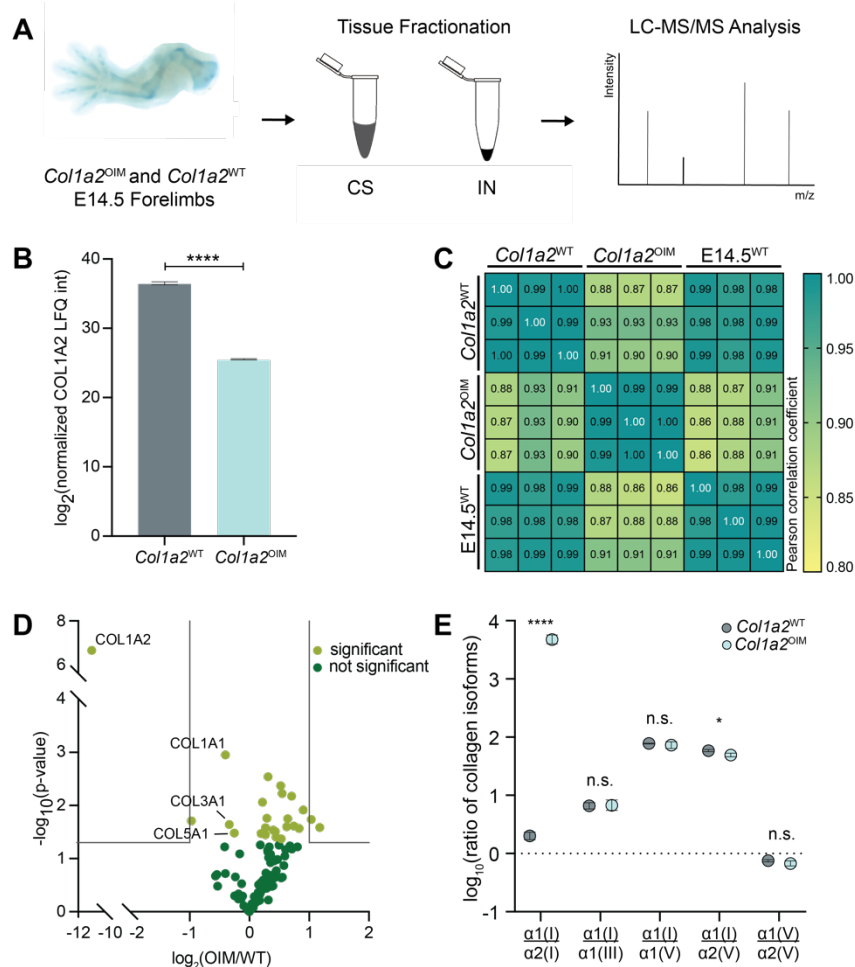

1286

1287

1288 **Figure 6.** Proteomic analysis of E14.5 *osteogenesis imperfecta murine* (OIM) forelimbs revealed

1289 matrisome composition was disrupted. **(A)** Forelimbs of OIM homozygous mutants (*Col1a2<sup>OIM</sup>*) and WT

1290 littermates (*Col1a2<sup>WT</sup>*) were fractionated and CS and IN fractions were analyzed by LC-MS/MS ( $n=3$

1291 biological replicates). **(B)** Validation of decreased COL1A2 abundance by LC-MS/MS in the IN fractions

1292 of *Col1a2<sup>OIM</sup>* and *Col1a2<sup>WT</sup>* forelimbs (two-tailed t-test; \*\*\*\* $p < 0.0001$ ). **(C)** Pearson correlation

1293 coefficients comparing matrisome compositions of the IN fractions of *Col1a2<sup>OIM</sup>* and *Col1a2<sup>WT</sup>* forelimbs,

1294 as well as E14.5 WT forelimbs (E14.5<sup>WT</sup>) from **Figures 2** and **3**. *Col1a2<sup>OIM</sup>* and *Col1a2<sup>WT</sup>* were moderately

1295 correlated, whereas *Col1a2<sup>WT</sup>* and E14.5<sup>WT</sup> were highly correlated, confirming the reproducibility of the

1296 methodology. **(D)** Volcano plot comparing ECM proteins identified in the IN fraction of *Col1a2<sup>OIM</sup>* and

1297 *Col1a2<sup>WT</sup>* forelimbs. Grey lines denote  $\geq 2$ -fold change and  $p < 0.05$  (two-tailed t-test). **(E)** The ratios of

1298 collagen chains associated with type I collagen fibrillogenesis in *Colla2*<sup>OIM</sup> and *Colla2*<sup>WT</sup> forelimbs.  
1299 Although the ratios between  $\alpha 1(I):\alpha 2(I)$  and  $\alpha 1(I):\alpha 2(V)$  were significantly different in *Colla2*<sup>OIM</sup>  
1300 forelimbs ( $*p < 0.05$ , two-tailed t-test), the other ratios were not affected by the mutation.  
1301

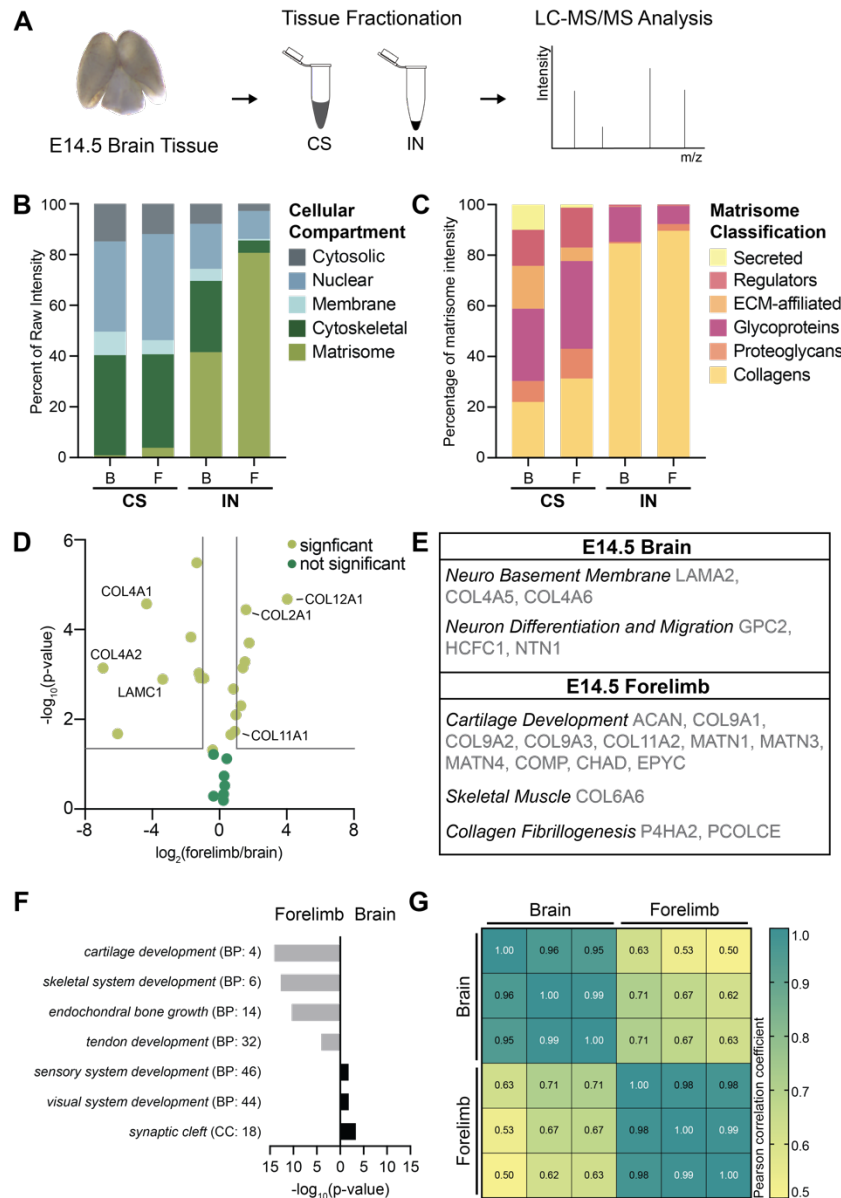

1302

1303

1304 **Figure 7.** LC-MS/MS analysis demonstrates the matrisome of the embryonic murine brains and forelimbs

1305 were significantly different. **(A)** LC-MS/MS analysis of CS and IN fractions of E14.5 brain tissue ( $n=3$

1306 biological replicates). **(B)** Proteins annotated by cellular compartment and plotted as average percentage of

1307 total raw intensity across biological replicates. B = brain; F = forelimb. **(C)** The distribution of matrisome

1308 classifications, determined by percentage of matrisome raw intensity, was significantly different between

1309 tissues ( $p<0.0001$ , two-way ANOVA). **(D)** Volcano plot of ECM proteins identified in the IN fraction of

1310 brain and forelimb tissues. Grey lines denote  $\geq 2$ -fold change and  $p < 0.05$ . **(E)** List of select ECM proteins,  
1311 exclusively identified in the brain or forelimb, grouped by biological function to highlight distinct  
1312 matrisome components of each tissue. **(F)** Select GO terms associated with ECM proteins more abundant  
1313 or exclusively identified in forelimb and brain tissues (**Table S7**). **(G)** Comparison of Pearson correlation  
1314 coefficients revealed differences in the matrisome identified in the IN fractions of brain and forelimb  
1315 tissues.

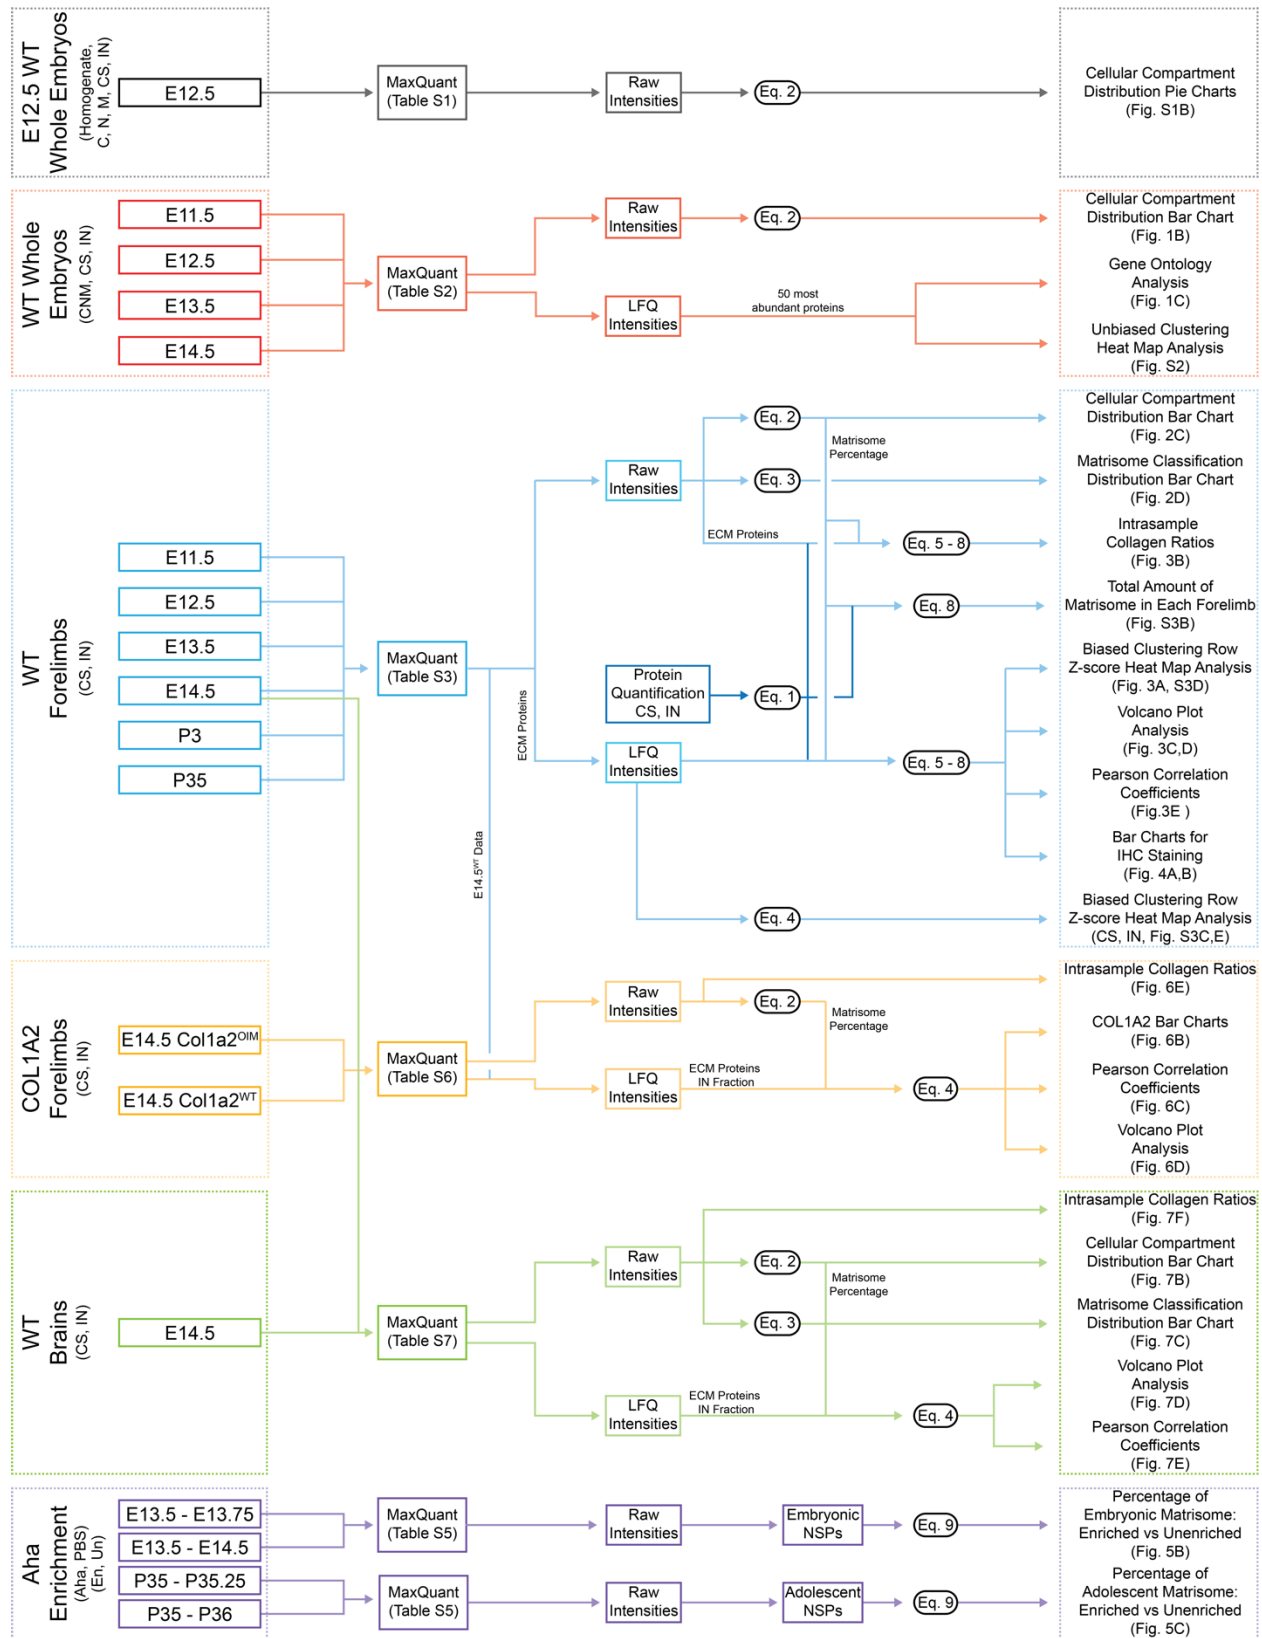

1316

1317 **Figure S7.** Workflow of data analysis.
